# Supplementary material for: Macro and Micro Diversity of Clostridium difficile Isolates from Diverse Sources and Geographical Locations
Source: PLoS One. 2012 Mar 2;7(3):e31559. doi: 10.1371/journal.pone.0031559 (PMC3292544; doi:10.1371/journal.pone.0031559)

1 = Red  
6 = Green  
8 = Blue  
3 = Yellow

**glyA 1**  
63a->q  
**glyA 20**  
370g->a(124A->T)  
**glyA 13**  
377a->c  
**glyA 12**  
3t->c 9g->t 15t->g 27a->g 108t->c 129c->t 162t->C 240g->a 345g->a 381g->a 414a->g 432c->t\* 453a->g 471t->g 495t->c  
**glyA 2**  
18t->c  
90t->a  
1.00  
**glyA 5**  
448g->a(150V->I)  
**glyA 6**  
48t->c\*  
0.97  
**glyA 7**  
3t->g  
0.94  
**glyA 8**  
165a->q  
**glyA 18**  
19c->a(7L->I)  
1.00  
**glyA 17**  
432c->t\*  
0.92  
**glyA 9**  
347c->t(116T->I)  
**glyA 10**  
507a->q!  
0.68  
**glyA 4**  
507a->c! (169E-D) 48t->c\* 294t->c  
**glyA 14**  
507g->a!  
**glyA 3**  
96t->q  
**glyA 19**  
276a->q  
0.66  
**glyA 16**  
267c->t  
**glyA 15**  
0.1

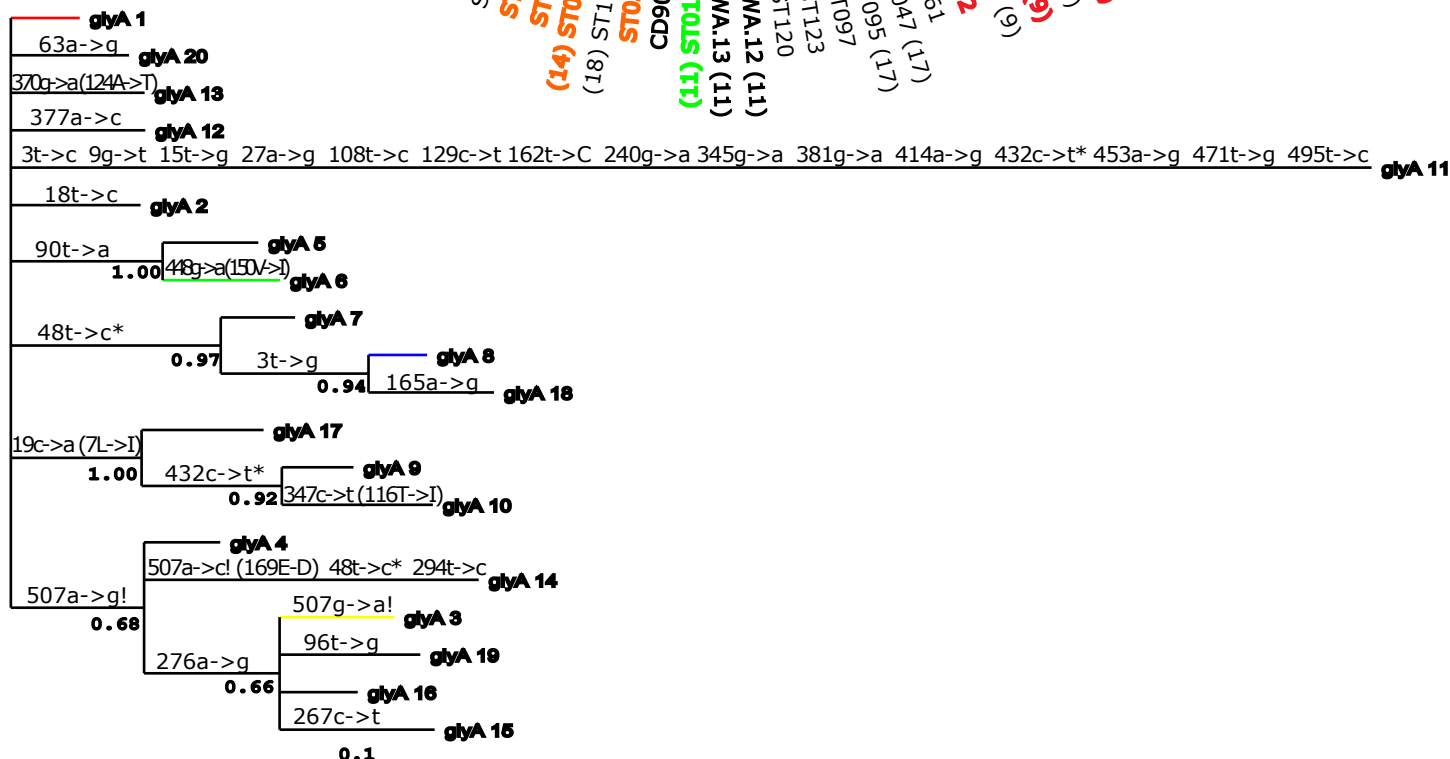

Supplement: Figure S4 — MAFFT circular phylogram with glyA alleles. A) Circle phylogeny coloured by allele. B) MrBayes SNP phylogram of glyA alleles coloured by allele. SNPs indicated on branch. * indicates a non-unique SNP that occurs in more than one place on phylogram. ! indicates a SNPs in glyA04 which has reverted to ancestral in glyA03 and into a non-synonymous SNP in glyA14. (PDF) [file pone.0031559.s004.pdf]
