# Supplementary material for: Macro and Micro Diversity of Clostridium difficile Isolates from Diverse Sources and Geographical Locations
Source: PubMed Central journal article supplement (PMC3292544; doi:10.1371/journal.pone.0031559), 2012-03-02

- 1 = Red
- 5 = Green
- 6 = Blue
- 8 = Yellow

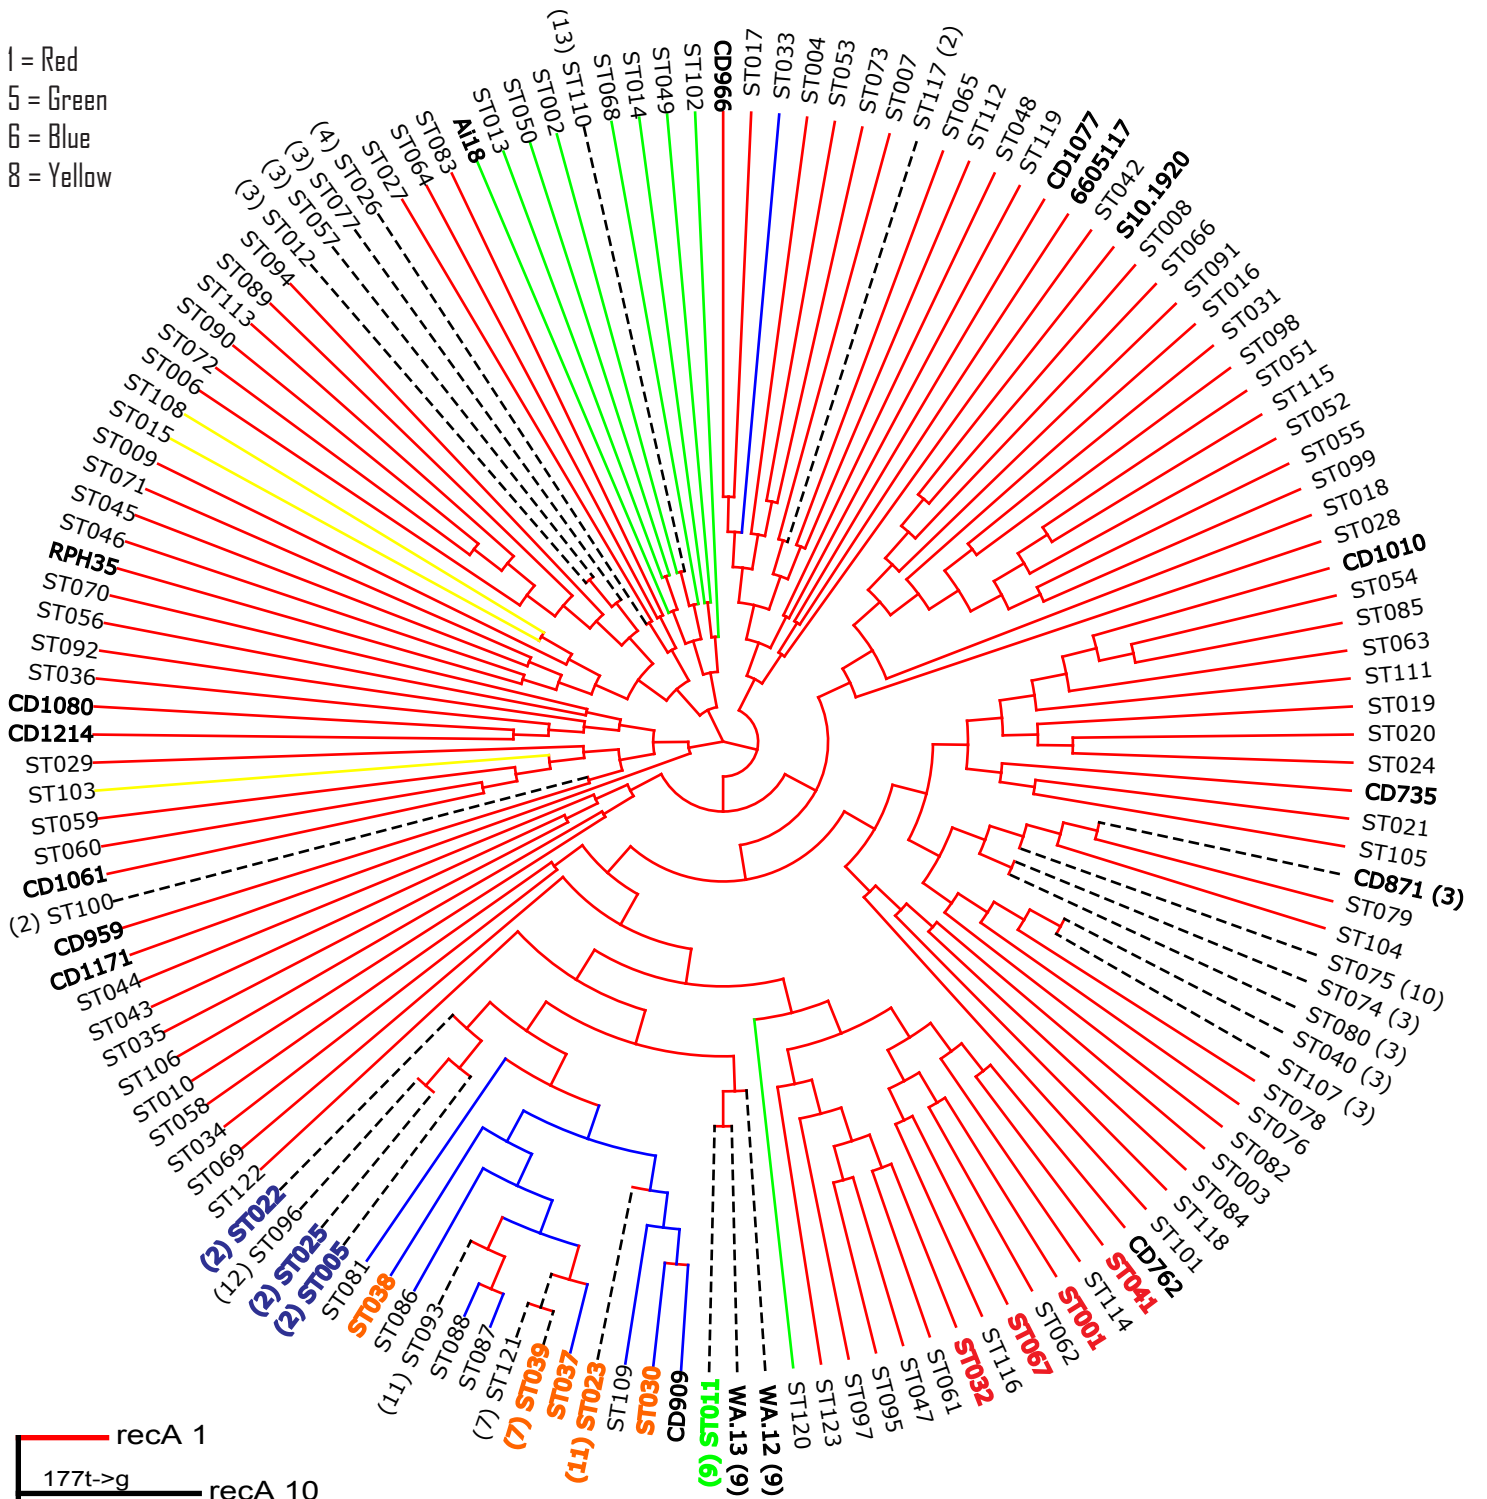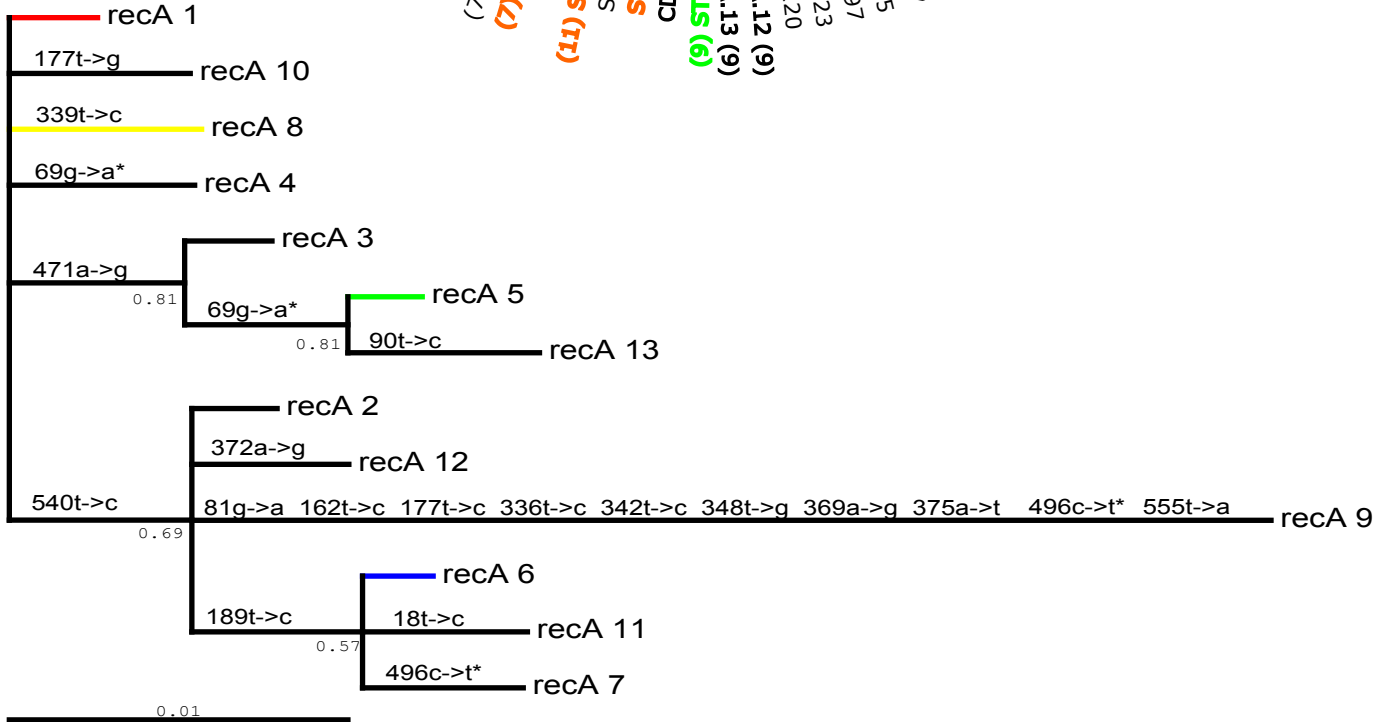

Supplement: pone.0031559.s005.pdf [file pone.0031559.s005.pdf]
