# Supplementary material for: Macro and Micro Diversity of Clostridium difficile Isolates from Diverse Sources and Geographical Locations
Source: PubMed Central journal article supplement (PMC3292544; doi:10.1371/journal.pone.0031559), 2012-03-02

1 = Red  
 3 = Green  
 6 = Blue  
 10 = Yellow

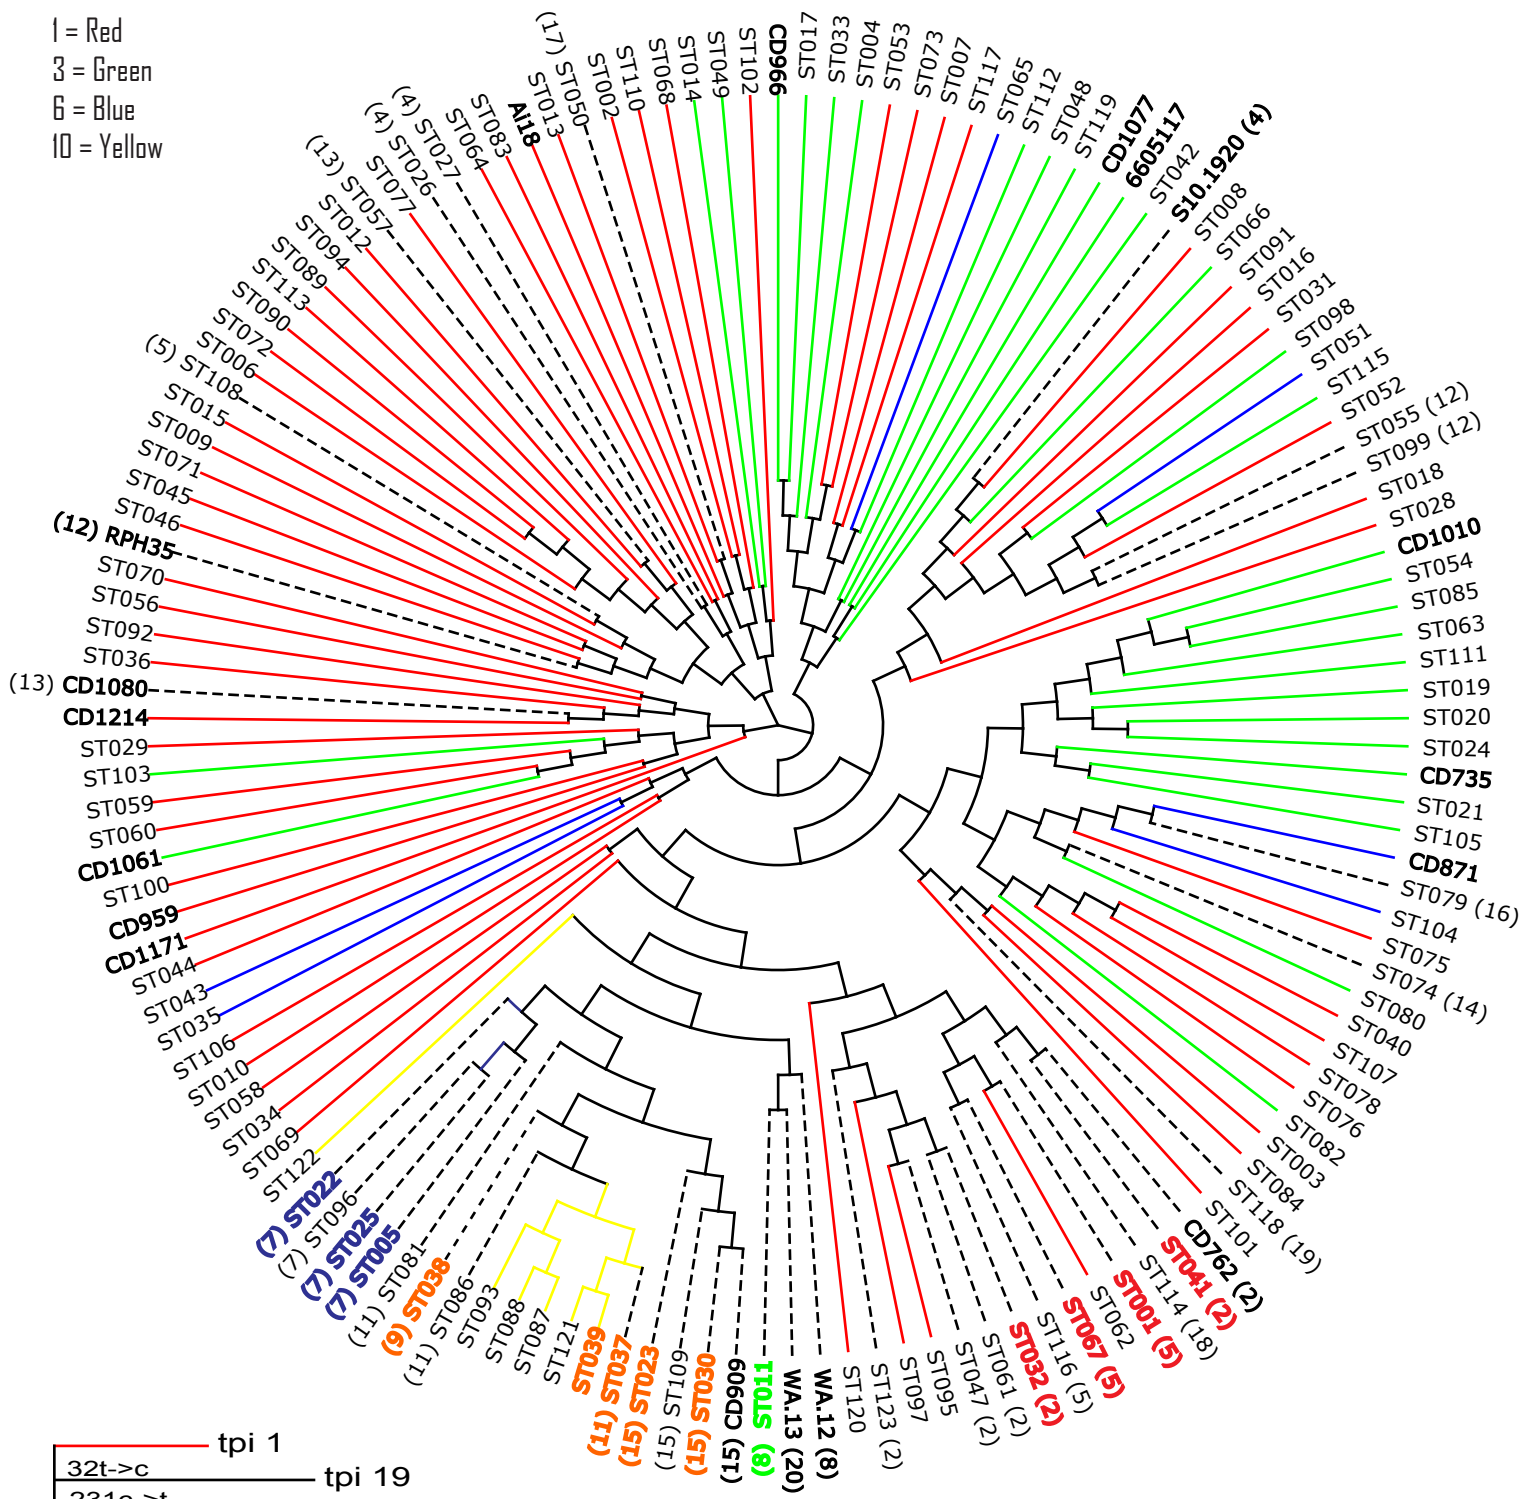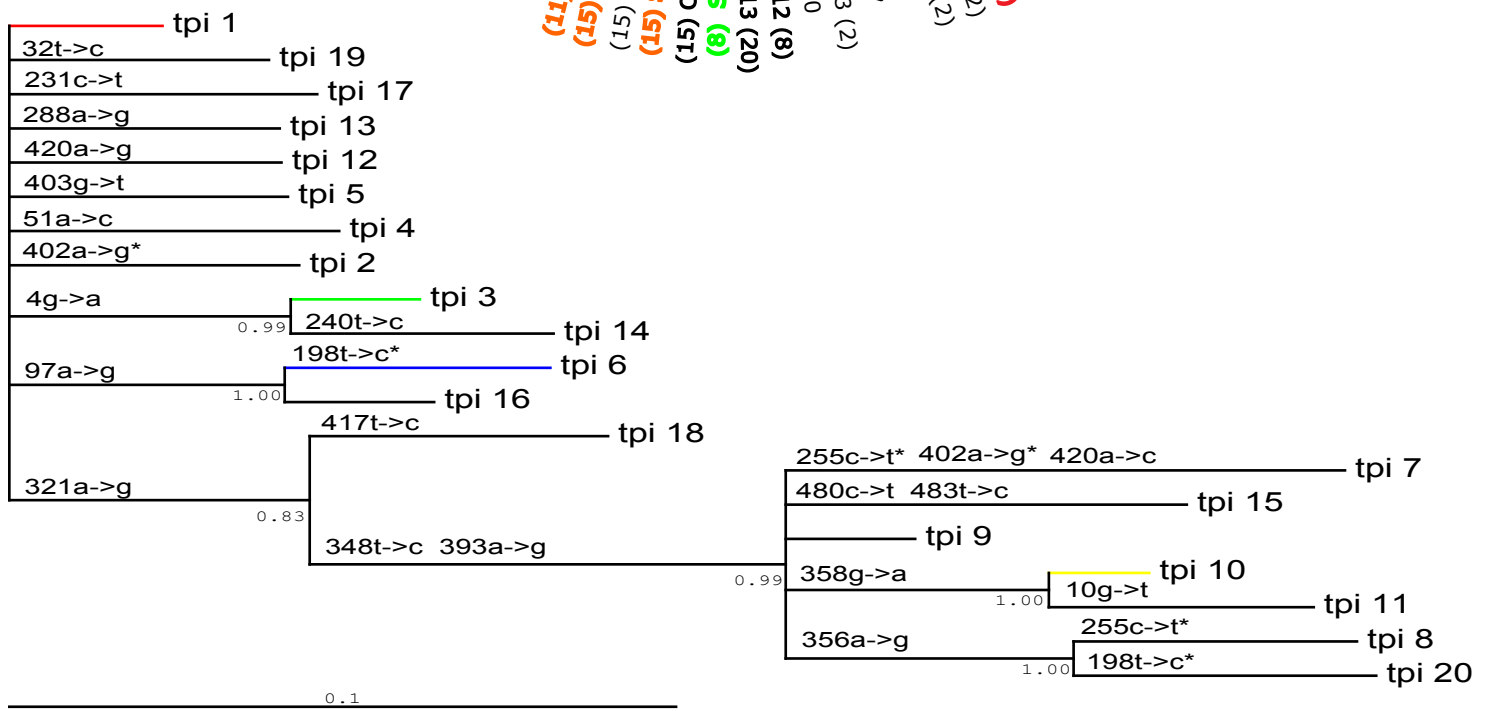

Supplement: pone.0031559.s007.pdf [file pone.0031559.s007.pdf]
