# Supplementary material for: Macro and Micro Diversity of Clostridium difficile Isolates from Diverse Sources and Geographical Locations
Source: PubMed Central journal article supplement (PMC3292544; doi:10.1371/journal.pone.0031559), 2012-03-02
Supplement: pone.0031559.s009.pdf [file pone.0031559.s009.pdf]

| Strain | Ribotype | ST group | adk | atpA | dxr | glyA | recA | sodA | tpi | ST   | Origin | Location    | Date isolated |
|--------|----------|----------|-----|------|-----|------|------|------|-----|------|--------|-------------|---------------|
| 630    | RT012    | grp 1    | 1   | 4    | 7   | 1    | 1    | 3    | 3   | ST54 | Human  | Switzerland | 1982          |
| IS58   | RT033    | grp 5    | 5   | 8    | 5   | 11   | 9    | 11   | 8   | ST11 | Human  | Australia   | before 2004   |
| 2046   | RT001    | grp 1    | 1   | 1    | 2   | 1    | 1    | 1    | 1   | ST03 |        |             |               |
| 2047   | NT       | grp 1    | 1   | 1    | 2   | 6    | 1    | 5    | 1   | ST08 |        |             |               |
| 2050   | RT015    | grp 1    | 2   | 5    | 2   | 1    | 1    | 3    | 1   | ST44 |        |             |               |
| 2052   | RT023    | grp 3    | 1   | 6    | 4   | 7    | 2    | 8    | 7   | ST05 |        |             |               |
| 2053   | RT027    | grp 2    | 1   | 1    | 1   | 10   | 1    | 3    | 5   | ST01 |        |             |               |
| 2054   | NT       | grp 5    | 5   | 8    | 5   | 11   | 9    | 11   | 8   | ST11 |        |             |               |
| 2055   | RT106    | grp 1    | 1   | 1    | 2   | 1    | 1    | 7    | 1   | ST42 |        |             |               |
| 5342   | NT       | grp 5    | 5   | 8    | 5   | 11   | 9    | 11   | 8   | ST11 | Bovine | USA         |               |
| 5350   | RT078    | grp 5    | 5   | 8    | 5   | 11   | 9    | 11   | 8   | ST11 | Bovine | USA         |               |
| 5359   | NT       | grp 2    | 1   | 1    | 1   | 10   | 1    | 3    | 5   | ST01 |        |             |               |
| 5361   | RT078    | grp 5    | 5   | 8    | 5   | 11   | 9    | 11   | 8   | ST11 | Bovine | USA         | 26/12/2006    |
| 5363   | RT078    | grp 5    | 5   | 8    | 5   | 11   | 9    | 11   | 8   | ST11 | Bovine | USA         | 20/03/2007    |
| 5370   | RT027    | grp 2    | 1   | 1    | 1   | 10   | 1    | 3    | 5   | ST01 | Bovine | USA         | 26/06/2007    |
| 5373   | RT027    | grp 2    | 1   | 1    | 1   | 10   | 1    | 3    | 5   | ST01 | Bovine | USA         | 20/03/2007    |
| 5379   | NT       | grp 5    | 5   | 8    | 5   | 11   | 9    | 11   | 8   | ST11 | Bovine | USA         |               |
| 5384   | RT078    | grp 5    | 5   | 8    | 5   | 11   | 9    | 11   | 8   | ST11 | Bovine | USA         | 20/03/2007    |
| 5397   | RT078    | grp 5    | 5   | 8    | 5   | 11   | 9    | 11   | 8   | ST11 | Bovine | USA         | 26/06/2007    |
| 5407   | RT078    | grp 5    | 5   | 8    | 5   | 11   | 9    | 11   | 8   | ST11 | Bovine | USA         | 26/09/2006    |
| 5408   | RT078    | grp 5    | 5   | 8    | 5   | 11   | 9    | 11   | 8   | ST11 | Bovine | USA         | 26/06/2007    |
| 5416   | NT       | grp 5    | 5   | 8    | 5   | 11   | 9    | 11   | 8   | ST11 | Bovine | USA         | 2006          |
| 5416   | RT078    | grp 5    | 5   | 8    | 5   | 11   | 9    | 11   | 8   | ST11 | Bovine | USA         | 2006          |
| 5427   | RT027    | grp 2    | 1   | 1    | 1   | 10   | 1    | 3    | 5   | ST01 | Bovine | USA         | 31/07/2007    |
| 5428   | RT078    | grp 5    | 5   | 8    | 5   | 11   | 9    | 11   | 8   | ST11 | Bovine | USA         | 20/03/2007    |
| 5429   | RT078    | grp 5    | 5   | 8    | 5   | 11   | 9    | 11   | 8   | ST11 | Bovine | USA         | 15/10/2007    |
| 5432   | RT078    | grp 5    | 5   | 8    | 5   | 11   | 9    | 11   | 8   | ST11 | Bovine | USA         | 23/01/2007    |
| 5444   | RT078    | grp 5    | 5   | 8    | 5   | 11   | 9    | 11   | 8   | ST11 | Bovine | USA         | 15/10/2007    |
| 5468   | NT       | grp 5    | 5   | 8    | 5   | 11   | 9    | 11   | 8   | ST11 | Bovine | USA         |               |
| 5898   | RT078    | grp 5    | 5   | 8    | 5   | 11   | 9    | 11   | 8   | ST11 | Bovine | USA         | 20/03/2007    |
| 5904   | RT078    | grp 5    | 5   | 8    | 5   | 11   | 9    | 11   | 8   | ST11 | Bovine | USA         | 15/10/2007    |
| 5911   | RT078    | grp 5    | 5   | 8    | 5   | 11   | 9    | 11   | 8   | ST11 | Bovine | USA         | 17/04/2007    |
| 5912   | NT       | grp 5    | 5   | 8    | 5   | 11   | 9    | 11   | 8   | ST11 | Bovine | USA         |               |
| 5917   | RT078    | grp 5    | 5   | 8    | 5   | 11   | 9    | 11   | 8   | ST11 | Bovine | USA         | 15/10/2007    |
| 5920   | NT       | grp 1    | 1   | 1    | 2   | 1    | 1    | 1    | 1   | ST03 | Bovine | USA         | 31/07/2007    |
| 5921   | RT078    | grp 5    | 5   | 8    | 5   | 11   | 9    | 11   | 8   | ST11 | Bovine | USA         | 20/11/2006    |
| 5927   | NT       | grp 5    | 5   | 8    | 5   | 11   | 9    | 11   | 8   | ST11 | Bovine | USA         |               |
| 5927   | NT       | grp 5    | 5   | 8    | 5   | 11   | 9    | 11   | 8   | ST11 | Bovine | USA         |               |
| 5933   | NT       | grp 5    | 5   | 8    | 5   | 11   | 9    | 11   | 8   | ST11 | Bovine | USA         |               |
| 5938   | RT078    | grp 5    | 5   | 8    | 5   | 11   | 9    | 11   | 8   | ST11 | Bovine | USA         | 20/11/2006    |
| 5946   | RT078    | grp 5    | 5   | 8    | 5   | 11   | 9    | 11   | 8   | ST11 | Bovine | USA         | 20/03/2007    |

|         |       |       |   |   |   |    |   |    |   |      |         |     |             |
|---------|-------|-------|---|---|---|----|---|----|---|------|---------|-----|-------------|
| 5954    | NT    | grp 5 | 5 | 8 | 5 | 11 | 9 | 11 | 8 | ST11 | Bovine  | USA |             |
| 5963    | RT078 | grp 5 | 5 | 8 | 5 | 11 | 9 | 11 | 8 | ST11 | Bovine  | USA | 20/11/2006  |
| 5968    | RT078 | grp 5 | 5 | 8 | 5 | 11 | 9 | 11 | 8 | ST11 | Bovine  | USA | 20/03/2007  |
| 5982    | RT078 | grp 5 | 5 | 8 | 5 | 11 | 9 | 11 | 8 | ST11 | Bovine  | USA | 20/11/2006  |
| 5983    | RT078 | grp 5 | 5 | 8 | 5 | 11 | 9 | 11 | 8 | ST11 | Bovine  | USA | 20/03/2007  |
| 5984    | RT078 | grp 5 | 5 | 8 | 5 | 11 | 9 | 11 | 8 | ST11 | Bovine  | USA | 15/10/2007  |
| 5986    | RT078 | grp 5 | 5 | 8 | 5 | 11 | 9 | 11 | 8 | ST11 | Bovine  | USA | 31/07/2007  |
| 5987    | RT078 | grp 5 | 5 | 8 | 5 | 11 | 9 | 11 | 8 | ST11 | Bovine  | USA | 15/10/2007  |
| 5992    | NT    | grp 5 | 5 | 8 | 5 | 11 | 9 | 11 | 8 | ST11 | Bovine  | USA |             |
| 5996    | RT078 | grp 5 | 5 | 8 | 5 | 11 | 9 | 11 | 8 | ST11 | Bovine  | USA | 15/10/2007  |
| 6004    | NT    | grp 5 | 5 | 8 | 5 | 11 | 9 | 11 | 8 | ST11 | Bovine  | USA |             |
| 6005    | RT078 | grp 5 | 5 | 8 | 5 | 11 | 9 | 11 | 8 | ST11 | Bovine  | USA | 26/06/2007  |
| 6007    | RT078 | grp 5 | 5 | 8 | 5 | 11 | 9 | 11 | 8 | ST11 | Bovine  | USA | 2007        |
| 6007    | RT078 | grp 5 | 5 | 8 | 5 | 11 | 9 | 11 | 8 | ST11 | Bovine  | USA | 2007        |
| 6014    | RT027 | grp 2 | 1 | 1 | 1 | 10 | 1 | 3  | 5 | ST01 | Bovine  | USA |             |
| 6015    | RT078 | grp 5 | 5 | 8 | 5 | 11 | 9 | 11 | 8 | ST11 | Bovine  | USA | 15/10/2007  |
| 6021    | RT078 | grp 5 | 5 | 8 | 5 | 11 | 9 | 11 | 8 | ST11 | Bovine  | USA | 20/03/2007  |
| 6065    | NT    | grp 5 | 5 | 8 | 5 | 11 | 9 | 11 | 8 | ST11 | Bovine  | USA |             |
| 6067    | NT    | grp 5 | 5 | 8 | 5 | 11 | 9 | 11 | 8 | ST11 | Bovine  | USA |             |
| 8864    | RT036 | grp 2 | 1 | 1 | 1 | 9  | 1 | 3  | 1 | ST62 | Human   | UK  | before 2004 |
| 10/33   | RT078 | grp 5 | 5 | 8 | 5 | 11 | 9 | 11 | 8 | ST11 |         |     |             |
| 30256   | NT    | grp 5 | 5 | 8 | 5 | 11 | 9 | 11 | 8 | ST11 | Bovine  | USA |             |
| 31807   | NT    | grp 5 | 5 | 8 | 5 | 11 | 9 | 11 | 8 | ST11 |         |     |             |
| 13/03   | RT078 | grp 5 | 5 | 8 | 5 | 11 | 9 | 11 | 8 | ST11 |         |     |             |
| 19/07   | RT078 | grp 5 | 5 | 8 | 5 | 11 | 9 | 11 | 8 | ST11 |         |     |             |
| 19/09   | RT078 | grp 5 | 5 | 8 | 5 | 11 | 9 | 11 | 8 | ST11 |         |     |             |
| 17/10   | RT078 | grp 5 | 5 | 8 | 5 | 11 | 9 | 11 | 8 | ST11 |         |     |             |
| 3/11    | RT078 | grp 5 | 5 | 8 | 5 | 11 | 9 | 11 | 8 | ST11 |         |     |             |
| 80249   | RT078 | grp 5 | 5 | 8 | 5 | 11 | 9 | 11 | 8 | ST11 |         |     | 20/03/2007  |
| 2004101 | RT027 | grp 2 | 1 | 1 | 1 | 10 | 1 | 3  | 5 | ST01 | Human   | USA | 2004        |
| 2004102 | RT027 | grp 2 | 1 | 1 | 1 | 10 | 1 | 3  | 5 | ST01 | Human   | USA | 2004        |
| 2004118 | RT027 | grp 2 | 1 | 1 | 1 | 10 | 1 | 3  | 5 | ST01 | Human   | USA | 2004        |
| 2004163 | RT027 | grp 2 | 1 | 1 | 1 | 10 | 1 | 3  | 5 | ST01 | Human   | USA | 2004        |
| 2005079 | NT    | grp 2 | 1 | 1 | 1 | 10 | 1 | 3  | 5 | ST01 | Human   | USA | 2005        |
| 2005088 | NT    | grp 5 | 5 | 8 | 5 | 11 | 9 | 11 | 8 | ST11 | Porcine | USA | 2005        |
| 2005093 | RT126 | grp 5 | 5 | 8 | 5 | 11 | 9 | 11 | 8 | ST11 | Porcine | USA | 2005        |
| 2005094 | NT    | grp 5 | 5 | 8 | 5 | 11 | 9 | 11 | 8 | ST11 | Porcine | USA | 2005        |
| 2005325 | RT078 | grp 5 | 5 | 8 | 5 | 11 | 9 | 11 | 8 | ST11 | Human   | USA | 2005        |
| 2005508 | NT    | grp 5 | 5 | 8 | 5 | 11 | 9 | 11 | 8 | ST11 | Porcine | USA | 2005        |
| 2005511 | RT078 | grp 5 | 5 | 8 | 5 | 11 | 9 | 11 | 8 | ST11 | Porcine | USA | 2005        |
| 2005515 | RT078 | grp 5 | 5 | 8 | 5 | 11 | 9 | 11 | 8 | ST11 | Porcine | USA | 2005        |
| 2005517 | NT    | grp 1 | 1 | 1 | 2 | 1  | 1 | 5  | 1 | ST48 | Porcine | USA | 2005        |

|         |       |       |   |   |    |    |   |    |   |      |         |       |      |
|---------|-------|-------|---|---|----|----|---|----|---|------|---------|-------|------|
| 2005519 | NT    | grp 5 | 5 | 8 | 5  | 11 | 9 | 11 | 8 | ST11 | Porcine | USA   | 2005 |
| 2006237 | RT027 | grp 2 | 1 | 1 | 1  | 10 | 1 | 3  | 5 | ST01 | Equine  | USA   | 2006 |
| 2006238 | RT078 | grp 5 | 5 | 8 | 5  | 11 | 9 | 11 | 8 | ST11 | Bovine  | USA   | 2006 |
| 2006239 | RT078 | grp 5 | 5 | 8 | 5  | 11 | 9 | 11 | 8 | ST11 | Bovine  | USA   | 2006 |
| 2006240 | RT078 | grp 5 | 5 | 8 | 5  | 11 | 9 | 11 | 8 | ST11 | Bovine  | USA   | 2006 |
| 2006241 | RT078 | grp 5 | 5 | 8 | 5  | 11 | 9 | 11 | 8 | ST11 | Bovine  | USA   | 2006 |
| 2006243 | RT078 | grp 5 | 5 | 8 | 5  | 11 | 9 | 11 | 8 | ST11 | Bovine  | USA   | 2006 |
| 2006244 | RT078 | grp 5 | 5 | 8 | 5  | 11 | 9 | 11 | 8 | ST11 | Bovine  | USA   | 2006 |
| 2006245 | RT078 | grp 5 | 5 | 8 | 5  | 11 | 9 | 11 | 8 | ST11 | Bovine  | USA   | 2006 |
| 2006246 | RT078 | grp 5 | 5 | 8 | 5  | 11 | 9 | 11 | 8 | ST11 | Bovine  | USA   | 2006 |
| 2006253 | RT078 | grp 5 | 5 | 8 | 5  | 11 | 9 | 11 | 8 | ST11 | Bovine  | USA   | 2006 |
| 2006254 | RT078 | grp 5 | 5 | 8 | 5  | 11 | 9 | 11 | 8 | ST11 | Bovine  | USA   | 2006 |
| 2006354 | RT078 | grp 5 | 5 | 8 | 5  | 11 | 9 | 11 | 8 | ST11 | Human   | USA   | 2006 |
| 2006379 | RT078 | grp 5 | 5 | 8 | 5  | 11 | 9 | 11 | 8 | ST11 | Human   | USA   | 2006 |
| 2006437 | RT078 | grp 5 | 5 | 8 | 5  | 11 | 9 | 11 | 8 | ST11 | Food    | USA   | 2006 |
| 2006438 | RT078 | grp 5 | 5 | 8 | 5  | 11 | 9 | 11 | 8 | ST11 | Food    | USA   | 2006 |
| 2006439 | RT027 | grp 2 | 1 | 1 | 1  | 10 | 1 | 3  | 5 | ST01 | Food    | USA   | 2006 |
| 2006460 | RT078 | grp 5 | 5 | 8 | 5  | 11 | 9 | 11 | 8 | ST11 | Human   | USA   | 2006 |
| 2007007 | RT078 | grp 5 | 5 | 8 | 5  | 11 | 9 | 11 | 8 | ST11 | Human   | USA   | 2007 |
| 2007011 | RT078 | grp 5 | 5 | 8 | 5  | 11 | 9 | 11 | 8 | ST11 | Human   | USA   | 2007 |
| 2007019 | RT126 | grp 5 | 5 | 8 | 5  | 11 | 9 | 11 | 8 | ST11 | Human   | USA   | 2007 |
| 2007024 | RT078 | grp 5 | 5 | 8 | 5  | 11 | 9 | 11 | 8 | ST11 | Human   | USA   | 2007 |
| 2007042 | RT027 | grp 2 | 1 | 1 | 1  | 10 | 1 | 3  | 5 | ST01 | Food    | USA   | 2007 |
| 2007054 | RT078 | grp 5 | 5 | 8 | 5  | 11 | 9 | 11 | 8 | ST11 | Human   | USA   | 2007 |
| 2007098 | NT    | grp 2 | 1 | 1 | 11 | 1  | 1 | 3  | 2 | ST32 | Human   | USA   | 2007 |
| 2007134 | NT    | grp 5 | 5 | 8 | 5  | 11 | 9 | 11 | 8 | ST11 | Human   | USA   | 2007 |
| 2007140 | RT027 | grp 2 | 1 | 1 | 1  | 10 | 1 | 3  | 5 | ST01 | Human   | USA   | 2007 |
| 2007195 | NT    | grp 2 | 1 | 1 | 9  | 9  | 1 | 3  | 2 | ST41 | Human   | USA   | 2007 |
| 2007206 | NT    | grp 5 | 5 | 8 | 5  | 11 | 9 | 11 | 8 | ST11 | Human   | USA   | 2007 |
| 2007218 | RT027 | grp 2 | 1 | 1 | 1  | 10 | 1 | 3  | 5 | ST01 | Food    | USA   | 2007 |
| 2007219 | RT078 | grp 5 | 5 | 8 | 5  | 11 | 9 | 11 | 8 | ST11 | Food    | USA   | 2007 |
| 2007222 | RT027 | grp 2 | 1 | 1 | 1  | 10 | 1 | 3  | 5 | ST01 | Food    | USA   | 2007 |
| 2007223 | RT027 | grp 2 | 1 | 1 | 1  | 10 | 1 | 3  | 5 | ST01 | Food    | USA   | 2007 |
| 2007224 | NT    | grp 5 | 5 | 8 | 5  | 11 | 9 | 11 | 8 | ST11 | Food    | USA   | 2007 |
| 2007229 | RT126 | grp 5 | 5 | 8 | 5  | 11 | 9 | 11 | 8 | ST11 | Food    | USA   | 2007 |
| 2007230 | RT078 | grp 5 | 5 | 8 | 5  | 11 | 9 | 11 | 8 | ST11 | Food    | USA   | 2007 |
| 2007235 | NT    | grp 2 | 1 | 1 | 1  | 10 | 1 | 3  | 5 | ST01 | Food    | USA   | 2007 |
| 2007334 | RT078 | grp 5 | 5 | 8 | 5  | 11 | 9 | 11 | 8 | ST11 | Human   | USA   | 2007 |
| 2007361 | RT078 | grp 5 | 5 | 8 | 5  | 11 | 9 | 11 | 8 | ST11 | Human   | USA   | 2007 |
| 2007380 | RT078 | grp 5 | 5 | 8 | 5  | 11 | 9 | 11 | 8 | ST11 | Human   | USA   | 2007 |
| 2007600 | RT126 | grp 5 | 5 | 8 | 5  | 11 | 9 | 11 | 8 | ST11 | Human   | Spain | 2007 |
| 2007601 | RT126 | grp 5 | 5 | 8 | 5  | 11 | 9 | 11 | 8 | ST11 | Human   | Spain | 2007 |

|         |       |       |   |   |    |    |   |    |   |             |           |       |      |
|---------|-------|-------|---|---|----|----|---|----|---|-------------|-----------|-------|------|
| 2007606 | RT078 | grp 5 | 5 | 8 | 5  | 11 | 9 | 11 | 8 | ST11        | Food      | USA   | 2007 |
| 2007607 | RT078 | grp 5 | 5 | 8 | 5  | 11 | 9 | 11 | 8 | ST11        | Food      | USA   | 2007 |
| 2007786 | RT078 | grp 5 | 5 | 8 | 5  | 11 | 9 | 11 | 8 | ST11        | Human     | Italy | 2007 |
| 2007792 | RT078 | grp 5 | 5 | 8 | 5  | 11 | 9 | 11 | 8 | ST11        | Human     | Italy | 2007 |
| 2007825 | RT027 | grp 2 | 1 | 1 | 1  | 10 | 1 | 3  | 5 | ST01        | Human     | USA   | 2007 |
| 2007826 | NT    | grp 2 | 1 | 5 | 11 | 1  | 1 | 3  | 2 | ST61        | Human     | USA   | 2007 |
| 2007827 | RT262 | grp 2 | 1 | 1 | 9  | 9  | 1 | 3  | 5 | ST67        | Human     | USA   | 2007 |
| 2007828 | NT    | grp 2 | 1 | 1 | 1  | 10 | 1 | 3  | 5 | ST01        | Human     | USA   | 2007 |
| 2007829 | RT262 | grp 2 | 1 | 1 | 9  | 9  | 1 | 3  | 5 | ST67        | Human     | USA   | 2007 |
| 2007830 | RT027 | grp 2 | 1 | 1 | 1  | 10 | 1 | 3  | 5 | ST01        | Human     | USA   | 2007 |
| 2007831 | RT001 | grp 1 | 1 | 1 | 2  | 1  | 1 | 1  | 1 | ST03        | Human     | USA   | 2007 |
| 2007832 | RT027 | grp 2 | 1 | 1 | 1  | 10 | 1 | 3  | 5 | ST01        | Human     | USA   | 2007 |
| 2007833 | RT027 | grp 2 | 1 | 1 | 1  | 10 | 1 | 3  | 5 | ST01        | Human     | USA   | 2007 |
| 2007834 | RT078 | grp 5 | 5 | 8 | 5  | 11 | 9 | 11 | 8 | ST11        | Human     | USA   | 2007 |
| 2007835 | RT078 | grp 5 | 5 | 8 | 5  | 11 | 9 | 11 | 8 | ST11        | Human     | USA   | 2007 |
| 2007838 | RT078 | grp 5 | 5 | 8 | 5  | 11 | 9 | 11 | 8 | ST11        | Human     | USA   | 2007 |
| 2007839 | NT    | grp 2 | 1 | 1 | 1  | 10 | 1 | 3  | 5 | ST01        | Human     | USA   | 2007 |
| 2007841 | NT    | grp 1 | 1 | 1 | 2  | 1  | 1 | 1  | 1 | ST03        | Human     | USA   | 2007 |
| 2007843 | NT    | grp 2 | 1 | 5 | 11 | 1  | 1 | 3  | 2 | ST61        | Food      | USA   | 2007 |
| 2007844 | NT    | grp 2 | 1 | 5 | 11 | 1  | 1 | 3  | 2 | ST61        | Food      | USA   | 2007 |
| 2007850 | RT027 | grp 2 | 1 | 1 | 1  | 10 | 1 | 3  | 5 | ST01        | Household | USA   | 2007 |
| 2007855 | RT027 | grp 2 | 1 | 1 | 1  | 10 | 1 | 3  | 5 | ST01        | Bovine    | USA   | 2007 |
| 6600639 | RT078 | grp 5 | 5 | 8 | 5  | 11 | 9 | 11 | 8 | ST11        | Human     | UK    |      |
| 6600726 | RT050 | grp 1 | 1 | 1 | 2  | 5  | 1 | 3  | 1 | ST18        | Human     | UK    |      |
| 6601158 | NT    | grp 1 | 1 | 1 | 2  | 1  | 1 | 5  | 3 | ST17        | Human     | UK    |      |
| 6601667 | RT002 | grp 1 | 1 | 1 | 2  | 6  | 1 | 5  | 1 | ST08        | Human     | UK    |      |
| 6603036 | RT015 | grp 1 | 2 | 1 | 2  | 1  | 1 | 3  | 1 | ST10        | Human     | UK    |      |
| 6603061 | NT    | grp 1 | 1 | 1 | 2  | 1  | 5 | 3  | 1 | ST02        | Human     | UK    |      |
| 6604395 | RT015 | grp 1 | 2 | 5 | 2  | 1  | 1 | 3  | 1 | ST44        | Human     | UK    |      |
| 6605117 | RT005 | grp 1 | 2 | 1 | 6  | 8  | 1 | 5  | 1 | New (ST131) | Human     | UK    |      |
| 6605475 | RT015 | grp 1 | 2 | 5 | 2  | 1  | 1 | 3  | 1 | ST44        | Human     | UK    |      |
| 6614282 | RT023 | grp 3 | 1 | 6 | 4  | 7  | 2 | 8  | 7 | ST05        | Human     | UK    |      |
| 6614376 | RT078 | grp 5 | 5 | 8 | 5  | 11 | 9 | 11 | 8 | ST11        | Human     | UK    |      |
| 6615591 | RT002 | grp 1 | 1 | 1 | 2  | 6  | 1 | 5  | 1 | ST08        | Human     | UK    |      |
| 6615723 | RT014 | grp 1 | 1 | 1 | 2  | 1  | 5 | 3  | 3 | ST49        | Human     | UK    |      |
| 6616023 | RT078 | grp 5 | 5 | 8 | 5  | 11 | 9 | 11 | 8 | ST11        | Human     | UK    |      |
| 6616104 | RT078 | grp 5 | 5 | 8 | 5  | 11 | 9 | 11 | 8 | ST11        | Human     | UK    |      |
| 001-01  | RT001 | grp 1 | 1 | 1 | 2  | 1  | 1 | 1  | 1 | ST03        |           | UK    |      |
| 001-02  | RT001 | grp 1 | 1 | 1 | 2  | 1  | 1 | 1  | 1 | ST03        |           | UK    |      |
| 001-03  | RT001 | grp 1 | 1 | 1 | 2  | 1  | 1 | 1  | 1 | ST03        |           | UK    |      |
| 001-04  | RT001 | grp 1 | 1 | 1 | 2  | 1  | 1 | 1  | 1 | ST03        |           | UK    |      |
| 001-05  | RT001 | grp 1 | 1 | 1 | 2  | 1  | 1 | 1  | 1 | ST03        |           | UK    |      |

|              |       |       |   |   |   |    |   |    |    |      |          |           |             |
|--------------|-------|-------|---|---|---|----|---|----|----|------|----------|-----------|-------------|
| 001-06       | RT001 | grp 1 | 1 | 1 | 2 | 1  | 1 | 1  | 1  | ST03 |          | UK        |             |
| 001-07       | RT001 | grp 1 | 1 | 1 | 2 | 1  | 1 | 1  | 1  | ST03 |          | UK        |             |
| 001-08       | RT001 | grp 1 | 1 | 1 | 2 | 1  | 5 | 3  | 1  | ST02 |          | UK        |             |
| 001-09       | RT001 | grp 1 | 1 | 1 | 2 | 1  | 1 | 1  | 1  | ST03 |          | UK        |             |
| 001-10       | RT001 | grp 1 | 1 | 1 | 2 | 1  | 1 | 1  | 1  | ST03 |          | UK        |             |
| 078W         | RT078 | grp 5 | 5 | 8 | 5 | 11 | 9 | 11 | 8  | ST11 |          |           |             |
| 106- 01      | RT106 | grp 1 | 1 | 1 | 2 | 1  | 1 | 7  | 1  | ST42 | Human    | UK        |             |
| 106- 02      | RT106 | grp 1 | 1 | 1 | 2 | 1  | 1 | 7  | 1  | ST42 | Human    | UK        |             |
| 106- 04      | RT106 | grp 1 | 1 | 1 | 2 | 1  | 1 | 7  | 1  | ST42 | Human    | UK        |             |
| 106- 05      | RT106 | grp 1 | 1 | 1 | 2 | 1  | 1 | 7  | 1  | ST42 | Human    | UK        |             |
| 106- 06      | RT106 | grp 1 | 1 | 1 | 2 | 1  | 1 | 7  | 1  | ST42 | Human    | UK        |             |
| 106-07       | RT106 | grp 1 | 1 | 1 | 2 | 1  | 1 | 7  | 1  | ST42 | Human    | UK        |             |
| 106-10       | RT106 | grp 1 | 1 | 1 | 2 | 1  | 1 | 7  | 1  | ST42 | Human    | UK        |             |
| 17/50        | RT078 | grp 5 | 5 | 8 | 5 | 11 | 9 | 11 | 8  | ST11 |          |           |             |
| 18/21        | RT078 | grp 5 | 5 | 8 | 5 | 11 | 9 | 11 | 8  | ST11 |          |           |             |
| 19/44        | RT078 | grp 5 | 5 | 8 | 5 | 11 | 9 | 11 | 8  | ST11 |          |           |             |
| 19/52        | RT078 | grp 5 | 5 | 8 | 5 | 11 | 9 | 11 | 8  | ST11 |          |           |             |
| 19/72        | RT078 | grp 5 | 5 | 8 | 5 | 11 | 9 | 11 | 8  | ST11 |          |           |             |
| 20/28        | RT078 | grp 5 | 5 | 8 | 5 | 11 | 9 | 11 | 8  | ST11 |          |           |             |
| 22/31        | RT078 | grp 5 | 5 | 8 | 5 | 11 | 9 | 11 | 8  | ST11 |          |           |             |
| 23/41        | RT078 | grp 5 | 5 | 8 | 5 | 11 | 9 | 11 | 8  | ST11 |          |           |             |
| 25/40        | RT078 | grp 5 | 5 | 8 | 5 | 11 | 9 | 11 | 8  | ST11 |          |           |             |
| 3623 -03     | NT    | grp 1 | 1 | 1 | 6 | 1  | 4 | 3  | 4  | ST26 | Human    | Germany   | before 2004 |
| 5353 (3/20)  | RT078 | grp 5 | 5 | 8 | 5 | 11 | 9 | 11 | 8  | ST11 | Bovine   | USA       | 20/03/2007  |
| 5354 (17/4)  | RT027 | grp 2 | 1 | 1 | 1 | 10 | 1 | 3  | 5  | ST01 | Bovine   | USA       |             |
| 5379 (26/12) | RT078 | grp 5 | 5 | 8 | 5 | 11 | 9 | 11 | 8  | ST11 | Bovine   | USA       |             |
| 5404 (17/4)  | RT078 | grp 5 | 5 | 8 | 5 | 11 | 9 | 11 | 8  | ST11 | Bovine   | USA       | 17/04/2007  |
| 5404 (9/26)  | RT078 | grp 5 | 5 | 8 | 5 | 11 | 9 | 11 | 8  | ST11 | Bovine   | USA       | 26/09/2006  |
| 5424 (2/20)  | RT078 | grp 5 | 5 | 8 | 5 | 11 | 9 | 11 | 8  | ST11 | Bovine   | USA       | 20/02/2007  |
| 5945 (2/21)  | NT    | grp 5 | 5 | 8 | 5 | 11 | 9 | 11 | 8  | ST11 | Bovine   | USA       | 20/11/2006  |
| 5964 (20/11) | RT078 | grp 5 | 5 | 8 | 5 | 11 | 9 | 11 | 8  | ST11 | Bovine   | USA       | 20/11/2006  |
| 5964 (9/1)   | RT078 | grp 5 | 5 | 8 | 5 | 11 | 9 | 11 | 8  | ST11 | Bovine   | USA       | 09/01/2007  |
| 5994 (9/4)   | NT    | grp 5 | 5 | 8 | 5 | 11 | 9 | 11 | 8  | ST11 | Bovine   | USA       | 04/09/2007  |
| 6612-065     | RT002 | grp 1 | 1 | 1 | 2 | 6  | 1 | 5  | 1  | ST08 | Human    | UK        |             |
| 6612-590     | RT015 | grp 1 | 2 | 5 | 2 | 1  | 1 | 3  | 1  | ST44 | Human    | UK        |             |
| 6612-647     | NT    | grp 1 | 1 | 1 | 6 | 6  | 1 | 12 | 12 | ST55 | Human    | UK        |             |
| 6612-820     | RT094 | grp 1 | 1 | 1 | 6 | 4  | 3 | 5  | 1  | ST12 | Human    | UK        |             |
| 6612-978     | RT094 | grp 1 | 1 | 1 | 6 | 4  | 3 | 5  | 1  | ST12 | Human    | UK        |             |
| 6613-373     | RT002 | grp 1 | 1 | 1 | 2 | 6  | 1 | 5  | 1  | ST08 | Human    | UK        |             |
| 6613-833     | RT087 | grp 1 | 4 | 1 | 6 | 1  | 1 | 10 | 1  | ST46 | Human    | UK        |             |
| AI149        | RT126 | grp 5 | 5 | 8 | 5 | 11 | 9 | 11 | 8  | ST11 | Kangaroo | Australia |             |
| AI15         | RT237 | grp 5 | 5 | 8 | 5 | 11 | 9 | 11 | 8  | ST11 | Porcine  | Australia |             |

|        |       |       |   |   |   |    |   |    |    |             |         |           |            |
|--------|-------|-------|---|---|---|----|---|----|----|-------------|---------|-----------|------------|
| AI152  | NT    | grp 5 | 5 | 8 | 5 | 11 | 9 | 11 | 8  | ST11        | Porcine | Australia |            |
| AI18   | RT014 | grp 1 | 5 | 1 | 6 | 1  | 5 | 3  | 1  | New (ST132) | Porcine | Australia |            |
| AI24   | RT237 | grp 5 | 5 | 8 | 5 | 11 | 9 | 11 | 8  | ST11        | Porcine | Australia |            |
| AI35   | RT237 | grp 5 | 5 | 8 | 5 | 11 | 9 | 11 | 8  | ST11        | Porcine | Australia |            |
| B1     | NT    | grp 1 | 1 | 1 | 7 | 5  | 1 | 3  | 3  | ST63        | Human   | UK        | 1978       |
| BI-1   | RT027 | grp 2 | 1 | 1 | 1 | 10 | 1 | 3  | 5  | ST01        | Human   | USA       | 26/02/1988 |
| BI-10  | RT027 | grp 2 | 1 | 1 | 1 | 10 | 1 | 3  | 5  | ST01        | Human   | USA       | 10/08/2001 |
| BI-13  | RT027 | grp 2 | 1 | 1 | 1 | 10 | 1 | 3  | 5  | ST01        | Human   | USA       | 09/09/2004 |
| BI-15  | RT027 | grp 2 | 1 | 1 | 1 | 10 | 1 | 3  | 5  | ST01        | Human   | USA       | 09/09/2004 |
| BI-2   | RT027 | grp 2 | 1 | 1 | 1 | 10 | 1 | 3  | 5  | ST01        | Human   | USA       | 14/01/1991 |
| BI-5   | RT027 | grp 2 | 1 | 1 | 1 | 10 | 1 | 3  | 5  | ST01        | Human   | USA       | 25/08/1995 |
| BI-6   | RT027 | grp 2 | 1 | 1 | 1 | 10 | 1 | 3  | 5  | ST01        | Human   | USA       | 20/05/2003 |
| BI-6p  | RT027 | grp 2 | 1 | 1 | 1 | 10 | 1 | 3  | 5  | ST01        | Human   | USA       | 09/09/2004 |
| BI-7   | RT027 | grp 2 | 1 | 1 | 1 | 10 | 1 | 3  | 5  | ST01        | Human   | USA       | 20/05/2003 |
| BI-8   | RT027 | grp 2 | 1 | 1 | 1 | 10 | 1 | 3  | 5  | ST01        | Human   | USA       | 22/01/2004 |
| BI-9   | RT001 | grp 1 | 1 | 1 | 2 | 1  | 1 | 1  | 1  | ST03        | Human   | USA       |            |
| CD DE2 | NT    | grp 1 | 1 | 1 | 2 | 1  | 1 | 1  | 1  | ST03        |         |           |            |
| CD#101 | NT    | grp 1 | 1 | 1 | 7 | 5  | 1 | 3  | 3  | ST63        |         |           |            |
| CD#17  | NT    | grp 4 | 3 | 7 | 3 | 8  | 6 | 9  | 11 | ST37        |         |           |            |
| CD#371 | NT    | grp 1 | 1 | 1 | 2 | 1  | 1 | 1  | 1  | ST03        |         |           |            |
| CD1    | RT027 | grp 2 | 1 | 1 | 1 | 10 | 1 | 3  | 5  | ST01        | Human   | UK        | 12.07.07   |
| CD1010 | RT274 | grp 1 | 1 | 1 | 7 | 1  | 1 | 3  | 3  | New (ST133) | Human   | UK        | 20/01/2010 |
| CD1049 | RT013 | grp 1 | 4 | 1 | 6 | 1  | 1 | 5  | 1  | ST45        | Human   | UK        | 03/03/2010 |
| CD1061 | RT283 | grp 1 | 1 | 3 | 2 | 15 | 1 | 3  | 3  | New (ST134) | Human   | UK        | 19/03/2010 |
| CD1075 | RT070 | grp 1 | 1 | 1 | 6 | 6  | 1 | 12 | 12 | ST55        | Human   | UK        | 04/03/2010 |
| CD1077 | RT106 | grp 1 | 1 | 1 | 2 | 8  | 1 | 7  | 1  | New (ST135) | Human   | UK        | 29/03/2010 |
| CD1079 | RT078 | grp 5 | 5 | 8 | 5 | 11 | 9 | 11 | 8  | ST11        | Human   | USA       | 27/03/2010 |
| CD1080 | RT052 | grp 1 | 2 | 1 | 6 | 16 | 1 | 5  | 13 | New (ST136) | Human   | UK        | 27/03/2010 |
| CD1099 | RT059 | grp 1 | 1 | 2 | 2 | 1  | 1 | 5  | 1  | ST53        | Human   | UK        | 02/04/2010 |
| CD11   | RT027 | grp 2 | 1 | 1 | 1 | 10 | 1 | 3  | 5  | ST01        | Human   | UK        | 21.05.07   |
| CD1108 | RT097 | grp 1 | 2 | 2 | 2 | 1  | 1 | 1  | 3  | ST21        | Human   | UK        | 18/04/2010 |
| CD1128 | RT118 | grp 1 | 1 | 1 | 2 | 1  | 1 | 7  | 1  | ST42        | Human   | UK        | 04/05/2010 |
| CD1132 | RT216 | grp 1 | 1 | 1 | 2 | 1  | 6 | 5  | 3  | ST33        | Human   | UK        | 07/05/2010 |
| CD1141 | RT020 | grp 1 | 1 | 1 | 2 | 1  | 5 | 3  | 1  | ST02        | Human   | UK        | 17/05/2010 |
| CD1143 | RT140 | grp 1 | 1 | 1 | 6 | 1  | 4 | 3  | 4  | ST26        | Human   | UK        | 04/05/2010 |
| CD1144 | RT003 | grp 1 | 1 | 1 | 6 | 4  | 3 | 5  | 13 | ST57        | Human   | UK        | 17/05/2010 |
| CD1149 | RT186 | grp 1 | 1 | 1 | 2 | 6  | 1 | 7  | 6  | ST51        | Human   | UK        | 23/05/2010 |
| CD1153 | RT139 | grp 1 | 1 | 1 | 2 | 16 | 1 | 12 | 1  | ST52        | Human   | UK        | 27/05/2010 |
| CD1157 | RT046 | grp 1 | 2 | 5 | 8 | 1  | 1 | 3  | 6  | ST35        | Human   | UK        | 24/05/2010 |
| CD1165 | RT053 | grp 1 | 1 | 1 | 7 | 5  | 1 | 3  | 3  | ST63        | Human   | UK        | 28/05/2010 |
| CD1170 | RT018 | grp 1 | 1 | 1 | 2 | 1  | 1 | 5  | 3  | ST17        | Human   | UK        | 22/05/2010 |
| CD1171 | RT029 | grp 1 | 1 | 1 | 2 | 3  | 1 | 3  | 1  | New (ST137) | Human   | UK        | 26/05/2010 |

|        |       |       |   |   |    |    |   |    |    |             |       |    |            |
|--------|-------|-------|---|---|----|----|---|----|----|-------------|-------|----|------------|
| CD1199 | RT021 | grp 1 | 1 | 3 | 6  | 3  | 1 | 5  | 1  | ST56        | Human | UK | 09/06/2010 |
| CD12   | RT027 | grp 2 | 1 | 1 | 1  | 10 | 1 | 3  | 5  | ST01        | Human | UK | 06.07.07   |
| CD1201 | RT015 | grp 1 | 2 | 1 | 2  | 1  | 1 | 3  | 1  | ST10        | Human | UK | 11/06/2010 |
| CD1202 | RT012 | grp 1 | 1 | 4 | 7  | 1  | 1 | 3  | 3  | ST54        | Human | UK | 09/05/2010 |
| CD1210 | RT054 | grp 1 | 1 | 7 | 6  | 1  | 1 | 5  | 6  | ST43        | Human | UK | 18/06/2010 |
| CD1214 | RT011 | grp 1 | 2 | 1 | 2  | 16 | 1 | 5  | 1  | New (ST138) | Human | UK | 04/12/2009 |
| CD1220 | RT005 | grp 1 | 2 | 1 | 6  | 1  | 1 | 5  | 1  | ST06        | Human | UK | 20/06/2010 |
| CD1224 | RT107 | grp 1 | 2 | 1 | 2  | 1  | 1 | 1  | 3  | New (ST139) | Human | UK | 14.06.10   |
| CD20   | RT027 | grp 2 | 1 | 1 | 1  | 10 | 1 | 3  | 5  | ST01        | Human | UK | 07.08.07   |
| CD25   | RT027 | grp 2 | 1 | 1 | 1  | 10 | 1 | 3  | 5  | ST01        | Human | UK | 31.07.07   |
| CD305  | RT023 | grp 3 | 1 | 1 | 4  | 7  | 2 | 8  | 7  | ST22        | Human | UK | 24.04.08   |
| CD453  | RT023 | grp 3 | 1 | 6 | 4  | 7  | 2 | 8  | 7  | ST05        | Human | UK | 30.09.08   |
| CD527  | RT030 | grp 1 | 1 | 1 | 2  | 1  | 1 | 5  | 1  | ST48        | Human | UK | 06/01/2009 |
| CD586  | RT017 | grp 4 | 3 | 7 | 3  | 8  | 6 | 9  | 11 | ST37        | Human | UK | 11.03.09   |
| CD59   | RT027 | grp 2 | 1 | 1 | 1  | 10 | 1 | 3  | 5  | ST01        | Human | UK | 11.08.07   |
| CD60   | RT027 | grp 2 | 1 | 1 | 1  | 10 | 1 | 3  | 5  | ST01        | Human | UK | 04.10.07   |
| CD630  | RT176 | grp 2 | 1 | 1 | 1  | 10 | 1 | 3  | 5  | ST01        | Human | UK | 04.04.09   |
| CD637  | RT017 | grp 4 | 3 | 7 | 3  | 8  | 6 | 9  | 11 | ST37        | Human | UK | 16.04.09   |
| CD679  | RT027 | grp 2 | 1 | 1 | 1  | 10 | 1 | 3  | 5  | ST01        | Human | UK | 16.04.09   |
| CD682  | RT027 | grp 2 | 1 | 1 | 1  | 10 | 1 | 3  | 5  | ST01        | Human | UK | 27.04.09   |
| CD683  | RT027 | grp 2 | 1 | 1 | 1  | 10 | 1 | 3  | 5  | ST01        | Human | UK | 23.04.09   |
| CD689  | RT064 | grp 1 | 1 | 1 | 2  | 1  | 6 | 5  | 3  | ST33        | Human | UK | 11/05/2009 |
| CD714  | RT050 | grp 1 | 1 | 1 | 2  | 6  | 1 | 3  | 1  | ST16        | Human | UK | 12.06.09   |
| CD718  | RT085 | grp 4 | 3 | 7 | 10 | 8  | 7 | 2  | 10 | ST39        | Human | UK | 08/06/2009 |
| CD735  | RT081 | grp 1 | 2 | 1 | 2  | 1  | 1 | 1  | 3  | New (ST139) | Human | UK | 03/07/2009 |
| CD742  | RT243 | grp 1 | 2 | 1 | 2  | 1  | 1 | 1  | 3  | New (ST139) | Human | UK | 01/01/2009 |
| CD759  | RT050 | grp 1 | 2 | 1 | 6  | 1  | 1 | 5  | 1  | ST06        | Human | UK | 15.07.09   |
| CD762  | RT111 | grp 2 | 1 | 1 | 9  | 9  | 1 | 1  | 2  | New (ST140) | Human | UK | 31/07/2009 |
| CD767  | RT015 | grp 1 | 2 | 1 | 2  | 1  | 1 | 3  | 1  | ST10        | Human | UK | 27.07.09   |
| CD790  | RT027 | grp 2 | 1 | 1 | 1  | 10 | 1 | 3  | 5  | ST01        | Human | UK | 02.08.09   |
| CD806  | RT027 | grp 2 | 1 | 1 | 1  | 10 | 1 | 3  | 5  | ST01        | Human | UK | 02.09.09   |
| CD81   | RT027 | grp 2 | 1 | 1 | 1  | 10 | 1 | 3  | 5  | ST01        | Human | UK | 28.08.07   |
| CD816  | RT017 | grp 4 | 3 | 7 | 3  | 8  | 6 | 9  | 11 | ST37        | Human | UK | 28.09.09   |
| CD825  | RT017 | grp 4 | 3 | 7 | 3  | 8  | 6 | 9  | 11 | ST37        | Human | UK | 01.10.09   |
| CD839  | RT017 | grp 4 | 3 | 7 | 3  | 8  | 6 | 9  | 11 | ST37        | Human | UK | 29.10.09   |
| CD853  | RT062 | grp 1 | 2 | 5 | 2  | 1  | 1 | 3  | 1  | ST44        | Human | UK | 21/10/2009 |
| CD871  | RT259 | grp 1 | 1 | 3 | 7  | 1  | 3 | 1  | 6  | New (ST141) | Human | UK | 06/11/2009 |
| CD877  | RT135 | grp 2 | 1 | 1 | 9  | 9  | 1 | 3  | 2  | ST41        | Human | UK | 22/11/2009 |
| CD886  | RT116 | grp 1 | 2 | 1 | 2  | 1  | 1 | 3  | 1  | ST10        | Human | UK | 06/12/2009 |
| CD909  | RT264 | grp 4 | 8 | 7 | 14 | 8  | 6 | 25 | 15 | New (ST142) | Human | UK | 17/12/2009 |
| CD914  | RT010 | grp 1 | 1 | 1 | 6  | 1  | 8 | 5  | 1  | ST15        | Human | UK | 14/12/2009 |
| CD915  | RT126 | grp 5 | 5 | 8 | 5  | 11 | 9 | 11 | 8  | ST11        | Human | UK | 02/12/2009 |

|          |       |       |   |    |   |    |   |    |    |             |         |             |             |
|----------|-------|-------|---|----|---|----|---|----|----|-------------|---------|-------------|-------------|
| CD917    | RT022 | grp 1 | 1 | 1  | 2 | 6  | 1 | 5  | 3  | ST66        | Human   | UK          | 20/12/2009  |
| CD955    | RT268 | grp 1 | 1 | 1  | 2 | 1  | 1 | 1  | 1  | ST03        | Human   | UK          | 15/01/2010  |
| CD959    | RT262 | grp 1 | 1 | 11 | 6 | 16 | 1 | 1  | 1  | New (ST143) | Human   | UK          | 13/01/2010  |
| CD966    | RT196 | grp 1 | 1 | 1  | 2 | 2  | 1 | 5  | 3  | New (ST144) | Human   | UK          | 22/01/2010  |
| CD970    | RT271 | grp 1 | 2 | 1  | 6 | 1  | 1 | 5  | 1  | ST06        | Human   | UK          | 23/01/2010  |
| CD973    | RT002 | grp 1 | 1 | 1  | 2 | 6  | 1 | 5  | 1  | ST08        | Human   | UK          | 24/11/2009  |
| CDT134   | RT002 | grp 1 | 1 | 1  | 2 | 6  | 1 | 5  | 1  | ST08        | Human   | UK          |             |
| CF3      | RT017 | grp 4 | 3 | 7  | 3 | 8  | 6 | 9  | 11 | ST37        | Human   | Belgium     | 1995        |
| CF5      | RT017 | grp 4 | 3 | 7  | 3 | 8  | 6 | 19 | 11 | ST86        | Human   | Belgium     | 1995        |
| DS209/06 | NT    | grp 2 | 1 | 1  | 1 | 10 | 1 | 3  | 5  | ST01        |         | UK          |             |
| E327 -98 | RT126 | grp 5 | 5 | 8  | 5 | 11 | 9 | 11 | 8  | ST11        | Equine  | Switzerland | before 2004 |
| ES173    | RT017 | grp 4 | 3 | 7  | 3 | 8  | 6 | 9  | 11 | ST37        | Human   | Australia   | 18/12/2006  |
| ES130    | RT280 | grp 5 | 5 | 8  | 5 | 11 | 9 | 11 | 8  | ST11        | Human   |             |             |
| ES166    | RT281 | grp 5 | 5 | 8  | 5 | 11 | 9 | 11 | 8  | ST11        | Human   | Australia   | 28/06/1905  |
| ES67     | RT014 | grp 1 | 1 | 1  | 6 | 1  | 5 | 3  | 1  | ST13        |         | Australia   |             |
| ES84     | RT027 | grp 2 | 1 | 1  | 1 | 10 | 1 | 3  | 5  | ST01        |         | Canada      |             |
| J9       | NT    | grp 1 | 1 | 1  | 2 | 1  | 1 | 1  | 1  | ST03        | Human   | USA         |             |
| JGS 6047 | NT    | grp 1 | 1 | 1  | 2 | 1  | 1 | 1  | 1  | ST03        | Equine  | USA         |             |
| JGS 679  | RT078 | grp 5 | 5 | 8  | 5 | 11 | 9 | 11 | 8  | ST11        | Bovine  | USA         |             |
| JGS344   | NT    | grp 1 | 2 | 5  | 8 | 1  | 1 | 3  | 6  | ST35        | Murine  | USA         |             |
| JGS355   | RT002 | grp 1 | 2 | 5  | 8 | 1  | 1 | 3  | 6  | ST35        | Murine  | USA         |             |
| JGS356   | RT002 | grp 1 | 2 | 5  | 8 | 1  | 1 | 3  | 6  | ST35        | Murine  | USA         |             |
| JGS357   | RT002 | grp 1 | 2 | 5  | 8 | 1  | 1 | 3  | 6  | ST35        | Murine  | USA         |             |
| JGS360   | RT002 | grp 1 | 2 | 5  | 8 | 1  | 1 | 3  | 6  | ST35        | Murine  | USA         |             |
| JGS6042  | RT002 | grp 1 | 1 | 1  | 2 | 6  | 1 | 5  | 1  | ST08        | Equine  | USA         |             |
| JGS6050  | RT020 | grp 1 | 1 | 1  | 2 | 1  | 5 | 3  | 1  | ST02        | Canine  | USA         |             |
| JGS655   | NT    | grp 1 | 1 | 1  | 2 | 6  | 1 | 5  | 1  | ST08        | Porcine | USA         |             |
| JGS673   | RT078 | grp 5 | 5 | 8  | 5 | 11 | 9 | 11 | 8  | ST11        | Bovine  | USA         |             |
| JGS674   | RT078 | grp 5 | 5 | 8  | 5 | 11 | 9 | 11 | 8  | ST11        | Bovine  | USA         |             |
| JGS675   | RT078 | grp 5 | 5 | 8  | 5 | 11 | 9 | 11 | 8  | ST11        | Bovine  | USA         |             |
| JGS676   | RT078 | grp 5 | 5 | 8  | 5 | 11 | 9 | 11 | 8  | ST11        | Bovine  | USA         |             |
| JGS677   | RT078 | grp 5 | 5 | 8  | 5 | 11 | 9 | 11 | 8  | ST11        | Bovine  | USA         |             |
| JGS688   | RT126 | grp 5 | 5 | 8  | 5 | 11 | 9 | 11 | 8  | ST11        | Porcine | USA         |             |
| JGS691   | RT078 | grp 5 | 5 | 8  | 5 | 11 | 9 | 11 | 8  | ST11        | Porcine | USA         |             |
| JGS692   | RT002 | grp 1 | 1 | 1  | 2 | 1  | 1 | 5  | 1  | ST48        | Porcine | USA         |             |
| M1       | NT    | grp 1 | 1 | 1  | 6 | 1  | 1 | 13 | 1  | ST64        |         |             |             |
| M120     | RT078 | grp 5 | 5 | 8  | 5 | 11 | 9 | 11 | 8  | ST11        | Human   | Ireland     |             |
| M13      | NT    | grp 1 | 1 | 1  | 6 | 1  | 8 | 5  | 1  | ST15        | Human   |             |             |
| M68      | RT017 | grp 4 | 3 | 7  | 3 | 8  | 6 | 9  | 11 | ST37        | Human   | Ireland     | 2006        |
| metal 1  | NT    | grp 5 | 5 | 8  | 5 | 11 | 9 | 11 | 8  | ST11        | Bovine  | USA         |             |
| O1-027   | RT027 | grp 2 | 1 | 1  | 1 | 10 | 1 | 3  | 5  | ST01        | Human   | UK          |             |
| O1-078   | RT078 | grp 5 | 5 | 8  | 5 | 11 | 9 | 11 | 8  | ST11        | Human   | UK          |             |



|                      |       |       |    |   |   |    |   |    |    |             |        |           |            |
|----------------------|-------|-------|----|---|---|----|---|----|----|-------------|--------|-----------|------------|
| PMH13                | RT010 | grp 1 | 1  | 1 | 6 | 1  | 8 | 5  | 1  | ST15        | Human  | Australia | 09/01/2007 |
| PMH44                | RT126 | grp 5 | 5  | 8 | 5 | 11 | 9 | 11 | 8  | ST11        | Human  | Australia | 16/08/2008 |
| R10287               | RT027 | grp 2 | 1  | 1 | 1 | 10 | 1 | 3  | 5  | ST01        | Human  | France    |            |
| R1040                | RT212 | grp 3 | 1  | 6 | 4 | 7  | 2 | 8  | 7  | ST05        | Human  |           |            |
| R10459               | RT106 | grp 1 | 1  | 1 | 2 | 1  | 1 | 7  | 1  | ST42        | Human  |           |            |
| R20291               | RT027 | grp 2 | 1  | 1 | 1 | 10 | 1 | 3  | 5  | ST01        | Human  | UK        | 2006       |
| R20352               | RT027 | grp 2 | 1  | 1 | 1 | 10 | 1 | 3  | 5  | ST01        | Human  | Canada    | 2005       |
| R279                 | NT    | grp 3 | 1  | 6 | 4 | 7  | 2 | 8  | 7  | ST05        | Human  |           |            |
| R711                 | RT031 | grp 1 | 1  | 1 | 2 | 16 | 1 | 3  | 1  | ST29        | Human  |           |            |
| R714                 | RT001 | grp 1 | 1  | 1 | 2 | 1  | 1 | 1  | 1  | ST03        | Human  |           |            |
| R8366                | RT001 | grp 1 | 1  | 1 | 2 | 1  | 1 | 1  | 1  | ST03        | Human  |           |            |
| R839                 | NT    | grp 1 | 1  | 1 | 2 | 1  | 1 | 1  | 1  | ST03        | Human  |           |            |
| R894                 | RT002 | grp 1 | 1  | 1 | 2 | 6  | 1 | 5  | 1  | ST08        | Human  |           |            |
| RPH101               | NT    | grp 5 | 5  | 8 | 5 | 11 | 9 | 11 | 8  | ST11        | Human  | Australia | 27/01/2007 |
| RPH13                | NT    | grp 1 | 1  | 1 | 7 | 5  | 1 | 3  | 3  | ST63        | Human  | Australia | 24/08/2006 |
| RPH35                | RT087 | grp 1 | 4  | 1 | 6 | 1  | 1 | 10 | 12 | New (ST145) | Human  | Australia | 30/08/2006 |
| RPH56                | RT014 | grp 1 | 1  | 1 | 2 | 1  | 5 | 3  | 1  | ST02        | Human  | Australia | 02/06/2006 |
| RPH61                | RT005 | grp 1 | 2  | 1 | 6 | 1  | 1 | 5  | 1  | ST06        | Human  | Australia | 04/11/2006 |
| RT023                | RT023 | grp 1 | 1  | 6 | 4 | 7  | 2 | 8  | 7  | ST05        |        |           |            |
| RT026                | RT026 | grp 1 | 1  | 1 | 7 | 1  | 1 | 5  | 1  | ST07        |        |           |            |
| RT042                | RT042 | grp 1 | 2  | 1 | 6 | 1  | 1 | 5  | 1  | ST06        |        |           |            |
| RT050                | RT050 | grp 1 | 1  | 1 | 2 | 5  | 1 | 3  | 1  | ST18        |        |           |            |
| RT176                | RT176 | grp 2 | 1  | 1 | 1 | 10 | 1 | 3  | 5  | ST01        |        |           |            |
| S10.1014             | RT027 | grp 2 | 1  | 1 | 1 | 10 | 1 | 3  | 5  | ST01        | Human  | UK        | 2010       |
| S10.1486             | NT    | grp 1 | 1  | 1 | 6 | 1  | 5 | 3  | 1  | ST13        | Human  | UK        | 2010       |
| S10.1920             | RT002 | grp 1 | 1  | 1 | 2 | 6  | 1 | 5  | 4  | New (ST146) | Human  | UK        | 2010       |
| S10.358              | RT078 | grp 5 | 5  | 8 | 5 | 11 | 9 | 11 | 8  | ST11        | Human  | UK        | 2010       |
| S10.564              | RT027 | grp 2 | 1  | 1 | 1 | 10 | 1 | 3  | 5  | ST01        | Human  | UK        | 2010       |
| slaughter 1          | RT078 | grp 5 | 5  | 8 | 5 | 11 | 9 | 11 | 8  | ST11        | Bovine | USA       |            |
| T7                   | NT    | grp 1 | 1  | 1 | 2 | 1  | 1 | 1  | 1  | ST03        | Human  |           |            |
| VPI 10463/ATCC 43255 | RT087 | grp 1 | 4  | 1 | 6 | 1  | 1 | 10 | 1  | ST46        | Human  | USA       | 1935       |
| WA 107               | RT127 | grp 5 | 5  | 8 | 5 | 11 | 9 | 11 | 8  | ST11        | Human  | Australia | 01/03/2006 |
| WA 12                | RT239 | grp 5 | 10 | 8 | 5 | 11 | 9 | 11 | 8  | New (ST147) | Human  | Australia |            |
| WA 122               | RT002 | grp 1 | 1  | 1 | 2 | 6  | 1 | 5  | 1  | ST08        | Human  | Australia | 14/04/2006 |
| WA 13                | RT291 | grp 5 | 5  | 8 | 5 | 11 | 9 | 11 | 20 | New (ST148) | Human  | Australia | 31/12/2005 |
| WA 146               | NT    | grp 1 | 1  | 1 | 6 | 6  | 1 | 12 | 12 | ST55        | Human  | Australia | 27/12/2005 |
| WA 15                | RT002 | grp 1 | 1  | 1 | 2 | 6  | 1 | 5  | 1  | ST08        | Human  | Australia | 05/01/2009 |
| WA 151               | RT237 | grp 5 | 5  | 8 | 5 | 11 | 9 | 11 | 8  | ST11        | Human  | Australia | 11/07/2006 |
| WA 156               | RT012 | grp 1 | 1  | 4 | 7 | 1  | 1 | 3  | 3  | ST54        | Human  | Australia | 14/06/2006 |
| WA 158               | NT    | grp 1 | 1  | 5 | 7 | 1  | 1 | 3  | 1  | ST34        | Human  | Australia | 08/06/2006 |
| WA 161               | RT010 | grp 1 | 1  | 1 | 6 | 1  | 8 | 5  | 1  | ST15        | Human  | Australia | 05/07/2006 |
| WA 169               | RT081 | grp 1 | 1  | 1 | 6 | 1  | 1 | 6  | 1  | ST09        | Human  | Australia | 02/06/2006 |

|       |       |       |          |          |   |    |   |    |    |      |       |           |            |
|-------|-------|-------|----------|----------|---|----|---|----|----|------|-------|-----------|------------|
| WA 48 | RT127 | grp 5 | <b>5</b> | 8        | 5 | 11 | 9 | 11 | 8  | ST11 | Human | Australia | 14/11/2005 |
| WA 52 | RT014 | grp 1 | <b>1</b> | 1        | 2 | 1  | 5 | 3  | 1  | ST02 | Human | Australia | 02/09/2005 |
| WA 68 | RT009 | grp 1 | <b>1</b> | 1        | 2 | 1  | 1 | 1  | 1  | ST03 | Human | Australia | 09/10/2005 |
| WA 76 | RT001 | grp 1 | <b>1</b> | 1        | 2 | 1  | 1 | 1  | 1  | ST03 | Human | Australia | 13/10/2005 |
| WA 77 | RT127 | grp 5 | <b>5</b> | <b>8</b> | 5 | 11 | 9 | 11 | 8  | ST11 | Human | Australia | 14/10/2005 |
| WA 80 | NT    | grp 1 | <b>1</b> | <b>1</b> | 6 | 6  | 1 | 12 | 12 | ST55 | Human | Australia | 19/10/2005 |
| WA 93 | RT054 | grp 1 | <b>1</b> | 7        | 6 | 1  | 1 | 5  | 6  | ST43 | Human | Australia | 28/01/2006 |
| WA 94 | RT078 | grp 5 | <b>5</b> | 8        | 5 | 11 | 9 | 11 | 8  | ST11 | Human | Australia | 19/01/2006 |
