# Supplementary material for: Macro and Micro Diversity of Clostridium difficile Isolates from Diverse Sources and Geographical Locations
Source: PubMed Central journal article supplement (PMC3292544; doi:10.1371/journal.pone.0031559), 2012-03-02
Supplement: pone.0031559.s010.pdf [file pone.0031559.s010.pdf]

| Strain      | Ribotype | atpA | dxr | glyA | recA | sodA | tpi | ST   | Origin    | Date isolated |            |
|-------------|----------|------|-----|------|------|------|-----|------|-----------|---------------|------------|
| 2053        | RT027    | 1    | 1   | 10   | 1    | 3    | 5   | ST01 |           |               |            |
| 5359        | NT       | 1    | 1   | 10   | 1    | 3    | 5   | ST01 |           |               |            |
| 5370        | RT027    | 1    | 1   | 10   | 1    | 3    | 5   | ST01 | Bovine    | USA           | 26/06/2007 |
| 5373        | RT027    | 1    | 1   | 10   | 1    | 3    | 5   | ST01 | Bovine    | USA           | 20/03/2007 |
| 5427        | RT027    | 1    | 1   | 10   | 1    | 3    | 5   | ST01 | Bovine    | USA           | 31/07/2007 |
| 6014        | RT027    | 1    | 1   | 10   | 1    | 3    | 5   | ST01 | Bovine    | USA           |            |
| 2004101     | RT027    | 1    | 1   | 10   | 1    | 3    | 5   | ST01 | Human     | USA           | 2004       |
| 2004102     | RT027    | 1    | 1   | 10   | 1    | 3    | 5   | ST01 | Human     | USA           | 2004       |
| 2004118     | RT027    | 1    | 1   | 10   | 1    | 3    | 5   | ST01 | Human     | USA           | 2004       |
| 2004163     | RT027    | 1    | 1   | 10   | 1    | 3    | 5   | ST01 | Human     | USA           | 2004       |
| 2005079     | NT       | 1    | 1   | 10   | 1    | 3    | 5   | ST01 | Human     | USA           | 2005       |
| 2006237     | RT027    | 1    | 1   | 10   | 1    | 3    | 5   | ST01 | Equine    | USA           | 2006       |
| 2006439     | RT027    | 1    | 1   | 10   | 1    | 3    | 5   | ST01 | Food      | USA           | 2006       |
| 2007042     | RT027    | 1    | 1   | 10   | 1    | 3    | 5   | ST01 | Food      | USA           | 2007       |
| 2007140     | RT027    | 1    | 1   | 10   | 1    | 3    | 5   | ST01 | Human     | USA           | 2007       |
| 2007218     | RT027    | 1    | 1   | 10   | 1    | 3    | 5   | ST01 | Food      | USA           | 2007       |
| 2007222     | RT027    | 1    | 1   | 10   | 1    | 3    | 5   | ST01 | Food      | USA           | 2007       |
| 2007223     | RT027    | 1    | 1   | 10   | 1    | 3    | 5   | ST01 | Food      | USA           | 2007       |
| 2007235     | NT       | 1    | 1   | 10   | 1    | 3    | 5   | ST01 | Food      | USA           | 2007       |
| 2007825     | RT027    | 1    | 1   | 10   | 1    | 3    | 5   | ST01 | Human     | USA           | 2007       |
| 2007828     | NT       | 1    | 1   | 10   | 1    | 3    | 5   | ST01 | Human     | USA           | 2007       |
| 2007830     | RT027    | 1    | 1   | 10   | 1    | 3    | 5   | ST01 | Human     | USA           | 2007       |
| 2007832     | RT027    | 1    | 1   | 10   | 1    | 3    | 5   | ST01 | Human     | USA           | 2007       |
| 2007833     | RT027    | 1    | 1   | 10   | 1    | 3    | 5   | ST01 | Human     | USA           | 2007       |
| 2007839     | NT       | 1    | 1   | 10   | 1    | 3    | 5   | ST01 | Human     | USA           | 2007       |
| 2007850     | RT027    | 1    | 1   | 10   | 1    | 3    | 5   | ST01 | Household | USA           | 2007       |
| 2007855     | RT027    | 1    | 1   | 10   | 1    | 3    | 5   | ST01 | Bovine    | USA           | 2007       |
| 5354 (17/4) | RT027    | 1    | 1   | 10   | 1    | 3    | 5   | ST01 | Bovine    | USA           |            |
| BI-1        | RT027    | 1    | 1   | 10   | 1    | 3    | 5   | ST01 | Human     | USA           | 26/02/1988 |
| BI-10       | RT027    | 1    | 1   | 10   | 1    | 3    | 5   | ST01 | Human     | USA           | 10/08/2001 |
| BI-13       | RT027    | 1    | 1   | 10   | 1    | 3    | 5   | ST01 | Human     | USA           | 09/09/2004 |
| BI-15       | RT027    | 1    | 1   | 10   | 1    | 3    | 5   | ST01 | Human     | USA           | 09/09/2004 |
| BI-2        | RT027    | 1    | 1   | 10   | 1    | 3    | 5   | ST01 | Human     | USA           | 14/01/1991 |
| BI-5        | RT027    | 1    | 1   | 10   | 1    | 3    | 5   | ST01 | Human     | USA           | 25/08/1995 |
| BI-6        | RT027    | 1    | 1   | 10   | 1    | 3    | 5   | ST01 | Human     | USA           | 20/05/2003 |
| BI-6p       | RT027    | 1    | 1   | 10   | 1    | 3    | 5   | ST01 | Human     | USA           | 09/09/2004 |
| BI-7        | RT027    | 1    | 1   | 10   | 1    | 3    | 5   | ST01 | Human     | USA           | 20/05/2003 |
| BI-8        | RT027    | 1    | 1   | 10   | 1    | 3    | 5   | ST01 | Human     | USA           | 22/01/2004 |
| CD1         | RT027    | 1    | 1   | 10   | 1    | 3    | 5   | ST01 | Human     | UK            | 12.07.07   |
| CD11        | RT027    | 1    | 1   | 10   | 1    | 3    | 5   | ST01 | Human     | UK            | 21.05.07   |
| CD12        | RT027    | 1    | 1   | 10   | 1    | 3    | 5   | ST01 | Human     | UK            | 06.07.07   |
| CD20        | RT027    | 1    | 1   | 10   | 1    | 3    | 5   | ST01 | Human     | UK            | 07.08.07   |
| CD25        | RT027    | 1    | 1   | 10   | 1    | 3    | 5   | ST01 | Human     | UK            | 31.07.07   |
| CD59        | RT027    | 1    | 1   | 10   | 1    | 3    | 5   | ST01 | Human     | UK            | 11.08.07   |
| CD60        | RT027    | 1    | 1   | 10   | 1    | 3    | 5   | ST01 | Human     | UK            | 04.10.07   |
| CD630       | RT176    | 1    | 1   | 10   | 1    | 3    | 5   | ST01 | Human     | UK            | 04.04.09   |
| CD679       | RT027    | 1    | 1   | 10   | 1    | 3    | 5   | ST01 | Human     | UK            | 16.04.09   |
| CD682       | RT027    | 1    | 1   | 10   | 1    | 3    | 5   | ST01 | Human     | UK            | 27.04.09   |
| CD683       | RT027    | 1    | 1   | 10   | 1    | 3    | 5   | ST01 | Human     | UK            | 23.04.09   |
| CD790       | RT027    | 1    | 1   | 10   | 1    | 3    | 5   | ST01 | Human     | UK            | 02.08.09   |
| CD806       | RT027    | 1    | 1   | 10   | 1    | 3    | 5   | ST01 | Human     | UK            | 02.09.09   |
| CD81        | RT027    | 1    | 1   | 10   | 1    | 3    | 5   | ST01 | Human     | UK            | 28.08.07   |
| DS209/06    | NT       | 1    | 1   | 10   | 1    | 3    | 5   | ST01 |           | UK            |            |
| ES84        | RT027    | 1    | 1   | 10   | 1    | 3    | 5   | ST01 |           | Australia     |            |
| O1-027      | RT027    | 1    | 1   | 10   | 1    | 3    | 5   | ST01 | Human     | UK            |            |
| R10287      | RT027    | 1    | 1   | 10   | 1    | 3    | 5   | ST01 | Human     | France        |            |
| R20291      | RT027    | 1    | 1   | 10   | 1    | 3    | 5   | ST01 | Human     | UK            | 2006       |
| R20352      | RT027    | 1    | 1   | 10   | 1    | 3    | 5   | ST01 | Human     | Canada        | 2005       |
| RT176       | RT176    | 1    | 1   | 10   | 1    | 3    | 5   | ST01 |           |               |            |
| S10.1014    | RT027    | 1    | 1   | 10   | 1    | 3    | 5   | ST01 | Human     | UK            | 2010       |
| S10.564     | RT027    | 1    | 1   | 10   | 1    | 3    | 5   | ST01 | Human     | UK            | 2010       |
| 2007098     | NT       | 1    | 11  | 1    | 1    | 3    | 2   | ST32 | Human     | USA           | 2007       |

|         |       |   |    |   |   |   |   |             |       |     |             |
|---------|-------|---|----|---|---|---|---|-------------|-------|-----|-------------|
| 2007195 | NT    | 1 | 9  | 9 | 1 | 3 | 2 | ST41        | Human | USA | 2007        |
| CD877   | RT135 | 1 | 9  | 9 | 1 | 3 | 2 | ST41        | Human | UK  | 22/11/2009  |
| 2007826 | NT    | 5 | 11 | 1 | 1 | 3 | 2 | ST61        | Human | USA | 2007        |
| 2007843 | NT    | 5 | 11 | 1 | 1 | 3 | 2 | ST61        | Food  | USA | 2007        |
| 2007844 | NT    | 5 | 11 | 1 | 1 | 3 | 2 | ST61        | Food  | USA | 2007        |
| 8864    | RT036 | 1 | 1  | 9 | 1 | 3 | 1 | ST62        | Human | UK  | before 2004 |
| 2007827 | RT262 | 1 | 9  | 9 | 1 | 3 | 5 | ST67        | Human | USA | 2007        |
| 2007829 | RT262 | 1 | 9  | 9 | 1 | 3 | 5 | ST67        | Human | USA | 2007        |
| CD762   | RT111 | 1 | 9  | 9 | 1 | 1 | 2 | New (ST140) | Human | UK  | 31/07/2009  |
