# Supplementary material for: Macro and Micro Diversity of Clostridium difficile Isolates from Diverse Sources and Geographical Locations
Source: PubMed Central journal article supplement (PMC3292544; doi:10.1371/journal.pone.0031559), 2012-03-02
Supplement: pone.0031559.s011.pdf [file pone.0031559.s011.pdf]

| Strain  | Ribotype | adk | atpA | dxr | glyA | recA | sodA | tpi | ST   | Origin  | Location  | Date isolated |
|---------|----------|-----|------|-----|------|------|------|-----|------|---------|-----------|---------------|
| IS58    | RT033    | 5   | 8    | 5   | 11   | 9    | 11   | 8   | ST11 | Human   | Australia | before 2004   |
| 5350    | RT078    | 5   | 8    | 5   | 11   | 9    | 11   | 8   | ST11 | Bovine  | USA       |               |
| 5361    | RT078    | 5   | 8    | 5   | 11   | 9    | 11   | 8   | ST11 | Bovine  | USA       | 26/12/2006    |
| 5363    | RT078    | 5   | 8    | 5   | 11   | 9    | 11   | 8   | ST11 | Bovine  | USA       | 20/03/2007    |
| 5384    | RT078    | 5   | 8    | 5   | 11   | 9    | 11   | 8   | ST11 | Bovine  | USA       | 20/03/2007    |
| 5397    | RT078    | 5   | 8    | 5   | 11   | 9    | 11   | 8   | ST11 | Bovine  | USA       | 26/06/2007    |
| 5407    | RT078    | 5   | 8    | 5   | 11   | 9    | 11   | 8   | ST11 | Bovine  | USA       | 26/09/2006    |
| 5408    | RT078    | 5   | 8    | 5   | 11   | 9    | 11   | 8   | ST11 | Bovine  | USA       | 26/06/2007    |
| 5416    | RT078    | 5   | 8    | 5   | 11   | 9    | 11   | 8   | ST11 | Bovine  | USA       | 2006          |
| 5428    | RT078    | 5   | 8    | 5   | 11   | 9    | 11   | 8   | ST11 | Bovine  | USA       | 20/03/2007    |
| 5429    | RT078    | 5   | 8    | 5   | 11   | 9    | 11   | 8   | ST11 | Bovine  | USA       | 15/10/2007    |
| 5432    | RT078    | 5   | 8    | 5   | 11   | 9    | 11   | 8   | ST11 | Bovine  | USA       | 23/01/2007    |
| 5444    | RT078    | 5   | 8    | 5   | 11   | 9    | 11   | 8   | ST11 | Bovine  | USA       | 15/10/2007    |
| 5898    | RT078    | 5   | 8    | 5   | 11   | 9    | 11   | 8   | ST11 | Bovine  | USA       | 20/03/2007    |
| 5904    | RT078    | 5   | 8    | 5   | 11   | 9    | 11   | 8   | ST11 | Bovine  | USA       | 15/10/2007    |
| 5911    | RT078    | 5   | 8    | 5   | 11   | 9    | 11   | 8   | ST11 | Bovine  | USA       | 17/04/2007    |
| 5917    | RT078    | 5   | 8    | 5   | 11   | 9    | 11   | 8   | ST11 | Bovine  | USA       | 15/10/2007    |
| 5921    | RT078    | 5   | 8    | 5   | 11   | 9    | 11   | 8   | ST11 | Bovine  | USA       | 20/11/2006    |
| 5938    | RT078    | 5   | 8    | 5   | 11   | 9    | 11   | 8   | ST11 | Bovine  | USA       | 20/11/2006    |
| 5946    | RT078    | 5   | 8    | 5   | 11   | 9    | 11   | 8   | ST11 | Bovine  | USA       | 20/03/2007    |
| 5963    | RT078    | 5   | 8    | 5   | 11   | 9    | 11   | 8   | ST11 | Bovine  | USA       | 20/11/2006    |
| 5968    | RT078    | 5   | 8    | 5   | 11   | 9    | 11   | 8   | ST11 | Bovine  | USA       | 20/03/2007    |
| 5982    | RT078    | 5   | 8    | 5   | 11   | 9    | 11   | 8   | ST11 | Bovine  | USA       | 20/11/2006    |
| 5983    | RT078    | 5   | 8    | 5   | 11   | 9    | 11   | 8   | ST11 | Bovine  | USA       | 20/03/2007    |
| 5984    | RT078    | 5   | 8    | 5   | 11   | 9    | 11   | 8   | ST11 | Bovine  | USA       | 15/10/2007    |
| 5986    | RT078    | 5   | 8    | 5   | 11   | 9    | 11   | 8   | ST11 | Bovine  | USA       | 31/07/2007    |
| 5987    | RT078    | 5   | 8    | 5   | 11   | 9    | 11   | 8   | ST11 | Bovine  | USA       | 15/10/2007    |
| 5996    | RT078    | 5   | 8    | 5   | 11   | 9    | 11   | 8   | ST11 | Bovine  | USA       | 15/10/2007    |
| 6005    | RT078    | 5   | 8    | 5   | 11   | 9    | 11   | 8   | ST11 | Bovine  | USA       | 26/06/2007    |
| 6007    | RT078    | 5   | 8    | 5   | 11   | 9    | 11   | 8   | ST11 | Bovine  | USA       | 2007          |
| 6007    | RT078    | 5   | 8    | 5   | 11   | 9    | 11   | 8   | ST11 | Bovine  | USA       | 2007          |
| 6015    | RT078    | 5   | 8    | 5   | 11   | 9    | 11   | 8   | ST11 | Bovine  | USA       | 15/10/2007    |
| 6021    | RT078    | 5   | 8    | 5   | 11   | 9    | 11   | 8   | ST11 | Bovine  | USA       | 20/03/2007    |
| 10/33   | RT078    | 5   | 8    | 5   | 11   | 9    | 11   | 8   | ST11 |         |           |               |
| 13/03   | RT078    | 5   | 8    | 5   | 11   | 9    | 11   | 8   | ST11 |         |           |               |
| 19/07   | RT078    | 5   | 8    | 5   | 11   | 9    | 11   | 8   | ST11 |         |           |               |
| 19/09   | RT078    | 5   | 8    | 5   | 11   | 9    | 11   | 8   | ST11 |         |           |               |
| 17/10   | RT078    | 5   | 8    | 5   | 11   | 9    | 11   | 8   | ST11 |         |           |               |
| 3/11    | RT078    | 5   | 8    | 5   | 11   | 9    | 11   | 8   | ST11 |         |           |               |
| 80249   | RT078    | 5   | 8    | 5   | 11   | 9    | 11   | 8   | ST11 |         |           | 20/03/2007    |
| 2005325 | RT078    | 5   | 8    | 5   | 11   | 9    | 11   | 8   | ST11 | Human   | USA       | 2005          |
| 2005511 | RT078    | 5   | 8    | 5   | 11   | 9    | 11   | 8   | ST11 | Porcine | USA       | 2005          |
| 2005515 | RT078    | 5   | 8    | 5   | 11   | 9    | 11   | 8   | ST11 | Porcine | USA       | 2005          |
| 2006238 | RT078    | 5   | 8    | 5   | 11   | 9    | 11   | 8   | ST11 | Bovine  | USA       | 2006          |
| 2006239 | RT078    | 5   | 8    | 5   | 11   | 9    | 11   | 8   | ST11 | Bovine  | USA       | 2006          |
| 2006240 | RT078    | 5   | 8    | 5   | 11   | 9    | 11   | 8   | ST11 | Bovine  | USA       | 2006          |
| 2006241 | RT078    | 5   | 8    | 5   | 11   | 9    | 11   | 8   | ST11 | Bovine  | USA       | 2006          |
| 2006243 | RT078    | 5   | 8    | 5   | 11   | 9    | 11   | 8   | ST11 | Bovine  | USA       | 2006          |
| 2006244 | RT078    | 5   | 8    | 5   | 11   | 9    | 11   | 8   | ST11 | Bovine  | USA       | 2006          |
| 2006245 | RT078    | 5   | 8    | 5   | 11   | 9    | 11   | 8   | ST11 | Bovine  | USA       | 2006          |
| 2006246 | RT078    | 5   | 8    | 5   | 11   | 9    | 11   | 8   | ST11 | Bovine  | USA       | 2006          |
| 2006253 | RT078    | 5   | 8    | 5   | 11   | 9    | 11   | 8   | ST11 | Bovine  | USA       | 2006          |
| 2006254 | RT078    | 5   | 8    | 5   | 11   | 9    | 11   | 8   | ST11 | Bovine  | USA       | 2006          |
| 2006354 | RT078    | 5   | 8    | 5   | 11   | 9    | 11   | 8   | ST11 | Human   | USA       | 2006          |
| 2006379 | RT078    | 5   | 8    | 5   | 11   | 9    | 11   | 8   | ST11 | Human   | USA       | 2006          |
| 2006437 | RT078    | 5   | 8    | 5   | 11   | 9    | 11   | 8   | ST11 | Food    | USA       | 2006          |
| 2006438 | RT078    | 5   | 8    | 5   | 11   | 9    | 11   | 8   | ST11 | Food    | USA       | 2006          |
| 2006460 | RT078    | 5   | 8    | 5   | 11   | 9    | 11   | 8   | ST11 | Human   | USA       | 2006          |
| 2007007 | RT078    | 5   | 8    | 5   | 11   | 9    | 11   | 8   | ST11 | Human   | USA       | 2007          |
| 2007011 | RT078    | 5   | 8    | 5   | 11   | 9    | 11   | 8   | ST11 | Human   | USA       | 2007          |
| 2007024 | RT078    | 5   | 8    | 5   | 11   | 9    | 11   | 8   | ST11 | Human   | USA       | 2007          |
| 2007054 | RT078    | 5   | 8    | 5   | 11   | 9    | 11   | 8   | ST11 | Human   | USA       | 2007          |

|              |       |   |   |   |    |   |    |   |      |          |             |             |
|--------------|-------|---|---|---|----|---|----|---|------|----------|-------------|-------------|
| 2007219      | RT078 | 5 | 8 | 5 | 11 | 9 | 11 | 8 | ST11 | Food     | USA         | 2007        |
| 2007230      | RT078 | 5 | 8 | 5 | 11 | 9 | 11 | 8 | ST11 | Food     | USA         | 2007        |
| 2007334      | RT078 | 5 | 8 | 5 | 11 | 9 | 11 | 8 | ST11 | Human    | USA         | 2007        |
| 2007361      | RT078 | 5 | 8 | 5 | 11 | 9 | 11 | 8 | ST11 | Human    | USA         | 2007        |
| 2007380      | RT078 | 5 | 8 | 5 | 11 | 9 | 11 | 8 | ST11 | Human    | USA         | 2007        |
| 2007606      | RT078 | 5 | 8 | 5 | 11 | 9 | 11 | 8 | ST11 | Food     | USA         | 2007        |
| 2007607      | RT078 | 5 | 8 | 5 | 11 | 9 | 11 | 8 | ST11 | Food     | USA         | 2007        |
| 2007786      | RT078 | 5 | 8 | 5 | 11 | 9 | 11 | 8 | ST11 | Human    | Italy       | 2007        |
| 2007792      | RT078 | 5 | 8 | 5 | 11 | 9 | 11 | 8 | ST11 | Human    | Italy       | 2007        |
| 2007834      | RT078 | 5 | 8 | 5 | 11 | 9 | 11 | 8 | ST11 | Human    | USA         | 2007        |
| 2007835      | RT078 | 5 | 8 | 5 | 11 | 9 | 11 | 8 | ST11 | Human    | USA         | 2007        |
| 2007838      | RT078 | 5 | 8 | 5 | 11 | 9 | 11 | 8 | ST11 | Human    | USA         | 2007        |
| 6600639      | RT078 | 5 | 8 | 5 | 11 | 9 | 11 | 8 | ST11 | Human    | UK          |             |
| 6614376      | RT078 | 5 | 8 | 5 | 11 | 9 | 11 | 8 | ST11 | Human    | UK          |             |
| 6616023      | RT078 | 5 | 8 | 5 | 11 | 9 | 11 | 8 | ST11 | Human    | UK          |             |
| 6616104      | RT078 | 5 | 8 | 5 | 11 | 9 | 11 | 8 | ST11 | Human    | UK          |             |
| 078W         | RT078 | 5 | 8 | 5 | 11 | 9 | 11 | 8 | ST11 |          |             |             |
| 17/50        | RT078 | 5 | 8 | 5 | 11 | 9 | 11 | 8 | ST11 |          |             |             |
| 18/21        | RT078 | 5 | 8 | 5 | 11 | 9 | 11 | 8 | ST11 |          |             |             |
| 19/44        | RT078 | 5 | 8 | 5 | 11 | 9 | 11 | 8 | ST11 |          |             |             |
| 19/52        | RT078 | 5 | 8 | 5 | 11 | 9 | 11 | 8 | ST11 |          |             |             |
| 19/72        | RT078 | 5 | 8 | 5 | 11 | 9 | 11 | 8 | ST11 |          |             |             |
| 20/28        | RT078 | 5 | 8 | 5 | 11 | 9 | 11 | 8 | ST11 |          |             |             |
| 22/31        | RT078 | 5 | 8 | 5 | 11 | 9 | 11 | 8 | ST11 |          |             |             |
| 23/41        | RT078 | 5 | 8 | 5 | 11 | 9 | 11 | 8 | ST11 |          |             |             |
| 25/40        | RT078 | 5 | 8 | 5 | 11 | 9 | 11 | 8 | ST11 |          |             |             |
| 5353 (3/20)  | RT078 | 5 | 8 | 5 | 11 | 9 | 11 | 8 | ST11 | Bovine   | USA         | 20/03/2007  |
| 5379 (26/12) | RT078 | 5 | 8 | 5 | 11 | 9 | 11 | 8 | ST11 | Bovine   | USA         |             |
| 5404 (17/4)  | RT078 | 5 | 8 | 5 | 11 | 9 | 11 | 8 | ST11 | Bovine   | USA         | 17/04/2007  |
| 5404 (9/26)  | RT078 | 5 | 8 | 5 | 11 | 9 | 11 | 8 | ST11 | Bovine   | USA         | 26/09/2006  |
| 5424 (2/20)  | RT078 | 5 | 8 | 5 | 11 | 9 | 11 | 8 | ST11 | Bovine   | USA         | 20/02/2007  |
| 5964 (20/11) | RT078 | 5 | 8 | 5 | 11 | 9 | 11 | 8 | ST11 | Bovine   | USA         | 20/11/2006  |
| 5964 (9/1)   | RT078 | 5 | 8 | 5 | 11 | 9 | 11 | 8 | ST11 | Bovine   | USA         | 09/01/2007  |
| CD1079       | RT078 | 5 | 8 | 5 | 11 | 9 | 11 | 8 | ST11 | Human    | USA         | 27/03/2010  |
| JGS 679      | RT078 | 5 | 8 | 5 | 11 | 9 | 11 | 8 | ST11 | Bovine   | USA         |             |
| JGS673       | RT078 | 5 | 8 | 5 | 11 | 9 | 11 | 8 | ST11 | Bovine   | USA         |             |
| JGS674       | RT078 | 5 | 8 | 5 | 11 | 9 | 11 | 8 | ST11 | Bovine   | USA         |             |
| JGS675       | RT078 | 5 | 8 | 5 | 11 | 9 | 11 | 8 | ST11 | Bovine   | USA         |             |
| JGS676       | RT078 | 5 | 8 | 5 | 11 | 9 | 11 | 8 | ST11 | Bovine   | USA         |             |
| JGS677       | RT078 | 5 | 8 | 5 | 11 | 9 | 11 | 8 | ST11 | Bovine   | USA         |             |
| JGS691       | RT078 | 5 | 8 | 5 | 11 | 9 | 11 | 8 | ST11 | Porcine  | USA         |             |
| M120         | RT078 | 5 | 8 | 5 | 11 | 9 | 11 | 8 | ST11 | Human    | Ireland     |             |
| O1-078       | RT078 | 5 | 8 | 5 | 11 | 9 | 11 | 8 | ST11 | Human    | UK          |             |
| S10.358      | RT078 | 5 | 8 | 5 | 11 | 9 | 11 | 8 | ST11 | Human    | UK          | 2010        |
| slaughter 1  | RT078 | 5 | 8 | 5 | 11 | 9 | 11 | 8 | ST11 | Bovine   | USA         |             |
| WA 94        | RT078 | 5 | 8 | 5 | 11 | 9 | 11 | 8 | ST11 | Human    | Australia   | 19/01/2006  |
| 2005093      | RT126 | 5 | 8 | 5 | 11 | 9 | 11 | 8 | ST11 | Porcine  | USA         | 2005        |
| 2007019      | RT126 | 5 | 8 | 5 | 11 | 9 | 11 | 8 | ST11 | Human    | USA         | 2007        |
| 2007229      | RT126 | 5 | 8 | 5 | 11 | 9 | 11 | 8 | ST11 | Food     | USA         | 2007        |
| 2007600      | RT126 | 5 | 8 | 5 | 11 | 9 | 11 | 8 | ST11 | Human    | Spain       | 2007        |
| 2007601      | RT126 | 5 | 8 | 5 | 11 | 9 | 11 | 8 | ST11 | Human    | Spain       | 2007        |
| AI149        | RT126 | 5 | 8 | 5 | 11 | 9 | 11 | 8 | ST11 | Kangaroo | Australia   |             |
| CD915        | RT126 | 5 | 8 | 5 | 11 | 9 | 11 | 8 | ST11 | Human    | UK          | 02/12/2009  |
| E327 -98     | RT126 | 5 | 8 | 5 | 11 | 9 | 11 | 8 | ST11 | Equine   | Switzerland | before 2004 |
| JGS688       | RT126 | 5 | 8 | 5 | 11 | 9 | 11 | 8 | ST11 | Porcine  | USA         |             |
| PMH44        | RT126 | 5 | 8 | 5 | 11 | 9 | 11 | 8 | ST11 | Human    | Australia   | 16/08/2008  |
| WA 107       | RT127 | 5 | 8 | 5 | 11 | 9 | 11 | 8 | ST11 | Human    | Australia   | 01/03/2006  |
| WA 48        | RT127 | 5 | 8 | 5 | 11 | 9 | 11 | 8 | ST11 | Human    | Australia   | 14/11/2005  |
| WA 48        | RT127 | 5 | 8 | 5 | 11 | 9 | 11 | 8 | ST11 | Human    | Australia   | 14/11/2005  |
| WA 77        | RT127 | 5 | 8 | 5 | 11 | 9 | 11 | 8 | ST11 | Human    | Australia   | 14/10/2005  |
| WA 77        | RT127 | 5 | 8 | 5 | 11 | 9 | 11 | 8 | ST11 | Human    | Australia   | 14/10/2005  |
| AI15         | RT237 | 5 | 8 | 5 | 11 | 9 | 11 | 8 | ST11 | Porcine  | Australia   |             |
| AI24         | RT237 | 5 | 8 | 5 | 11 | 9 | 11 | 8 | ST11 | Porcine  | Australia   |             |

|             |       |    |   |   |    |   |    |    |             |         |           |            |
|-------------|-------|----|---|---|----|---|----|----|-------------|---------|-----------|------------|
| AI35        | RT237 | 5  | 8 | 5 | 11 | 9 | 11 | 8  | ST11        | Porcine | Australia |            |
| WA 151      | RT237 | 5  | 8 | 5 | 11 | 9 | 11 | 8  | ST11        | Human   | Australia | 11/07/2006 |
| ES130       | RT280 | 5  | 8 | 5 | 11 | 9 | 11 | 8  | ST11        | Human   |           |            |
| ES166       | RT281 | 5  | 8 | 5 | 11 | 9 | 11 | 8  | ST11        | Human   | Australia | 28/06/1905 |
| 2054        | NT    | 5  | 8 | 5 | 11 | 9 | 11 | 8  | ST11        |         |           |            |
| 5342        | NT    | 5  | 8 | 5 | 11 | 9 | 11 | 8  | ST11        | Bovine  | USA       |            |
| 5379        | NT    | 5  | 8 | 5 | 11 | 9 | 11 | 8  | ST11        | Bovine  | USA       |            |
| 5416        | NT    | 5  | 8 | 5 | 11 | 9 | 11 | 8  | ST11        | Bovine  | USA       | 2006       |
| 5468        | NT    | 5  | 8 | 5 | 11 | 9 | 11 | 8  | ST11        | Bovine  | USA       |            |
| 5912        | NT    | 5  | 8 | 5 | 11 | 9 | 11 | 8  | ST11        | Bovine  | USA       |            |
| 5927        | NT    | 5  | 8 | 5 | 11 | 9 | 11 | 8  | ST11        | Bovine  | USA       |            |
| 5927        | NT    | 5  | 8 | 5 | 11 | 9 | 11 | 8  | ST11        | Bovine  | USA       |            |
| 5933        | NT    | 5  | 8 | 5 | 11 | 9 | 11 | 8  | ST11        | Bovine  | USA       |            |
| 5954        | NT    | 5  | 8 | 5 | 11 | 9 | 11 | 8  | ST11        | Bovine  | USA       |            |
| 5992        | NT    | 5  | 8 | 5 | 11 | 9 | 11 | 8  | ST11        | Bovine  | USA       |            |
| 6004        | NT    | 5  | 8 | 5 | 11 | 9 | 11 | 8  | ST11        | Bovine  | USA       |            |
| 6065        | NT    | 5  | 8 | 5 | 11 | 9 | 11 | 8  | ST11        | Bovine  | USA       |            |
| 6067        | NT    | 5  | 8 | 5 | 11 | 9 | 11 | 8  | ST11        | Bovine  | USA       |            |
| 30256       | NT    | 5  | 8 | 5 | 11 | 9 | 11 | 8  | ST11        | Bovine  | USA       |            |
| 31807       | NT    | 5  | 8 | 5 | 11 | 9 | 11 | 8  | ST11        |         |           |            |
| 2005088     | NT    | 5  | 8 | 5 | 11 | 9 | 11 | 8  | ST11        | Porcine | USA       | 2005       |
| 2005094     | NT    | 5  | 8 | 5 | 11 | 9 | 11 | 8  | ST11        | Porcine | USA       | 2005       |
| 2005508     | NT    | 5  | 8 | 5 | 11 | 9 | 11 | 8  | ST11        | Porcine | USA       | 2005       |
| 2005519     | NT    | 5  | 8 | 5 | 11 | 9 | 11 | 8  | ST11        | Porcine | USA       | 2005       |
| 2007134     | NT    | 5  | 8 | 5 | 11 | 9 | 11 | 8  | ST11        | Human   | USA       | 2007       |
| 2007206     | NT    | 5  | 8 | 5 | 11 | 9 | 11 | 8  | ST11        | Human   | USA       | 2007       |
| 2007224     | NT    | 5  | 8 | 5 | 11 | 9 | 11 | 8  | ST11        | Food    | USA       | 2007       |
| 5945 (2/21) | NT    | 5  | 8 | 5 | 11 | 9 | 11 | 8  | ST11        | Bovine  | USA       | 20/11/2006 |
| 5994 (9/4)  | NT    | 5  | 8 | 5 | 11 | 9 | 11 | 8  | ST11        | Bovine  | USA       | 04/09/2007 |
| AI152       | NT    | 5  | 8 | 5 | 11 | 9 | 11 | 8  | ST11        | Porcine | Australia |            |
| metal 1     | NT    | 5  | 8 | 5 | 11 | 9 | 11 | 8  | ST11        | Bovine  | USA       |            |
| RPH101      | NT    | 5  | 8 | 5 | 11 | 9 | 11 | 8  | ST11        | Human   | Australia | 27/01/2007 |
| WA 12       | RT239 | 10 | 8 | 5 | 11 | 9 | 11 | 8  | New (ST147) | Human   | Australia |            |
| WA 13       | RT291 | 5  | 8 | 5 | 11 | 9 | 11 | 20 | New (ST148) | Human   | Australia | 31/12/2005 |
