# Supplementary material for: Macro and Micro Diversity of Clostridium difficile Isolates from Diverse Sources and Geographical Locations
Source: PubMed Central journal article supplement (PMC3292544; doi:10.1371/journal.pone.0031559), 2012-03-02
Supplement: pone.0031559.s012.pdf [file pone.0031559.s012.pdf]

| Griffiths | Dingle | Stabler | Nos | Con   | ST  | adk | atpA | dxr | glyA | recA | sodA | tpi |             |
|-----------|--------|---------|-----|-------|-----|-----|------|-----|------|------|------|-----|-------------|
| RT001     | RT001  | RT001   | 15  | RT001 | 3   | 1   | 1    | 2   | 1    | 1    | 1    | 1   |             |
|           |        | RT002   | 1   | RT002 | 2   | 1   | 1    | 2   | 1    | 5    | 3    | 1   |             |
| RT002     | RT002  | RT002   | 10  | RT002 | 8   | 1   | 1    | 2   | 6    | 1    | 5    | 1   |             |
|           |        | RT002   | 4   | RT002 | 35  | 2   | 5    | 8   | 1    | 1    | 3    | 6   |             |
|           |        | RT002   | 1   | RT002 | 48  | 1   | 1    | 2   | 1    | 1    | 5    | 1   |             |
|           |        | RT002   | 1   | RT002 | New | 1   | 1    | 2   | 6    | 1    | 5    | 4   | New (ST146) |
| RT003     | RT003  |         |     | RT003 | 12  | 1   | 1    | 6   | 4    | 3    | 5    | 1   |             |
|           |        | RT003   | 1   | RT003 | 57  | 1   | 1    | 6   | 4    | 3    | 5    | 13  |             |
| RT005     | RT005  | RT005   | 2   | RT005 | 6   | 2   | 1    | 6   | 1    | 1    | 5    | 1   |             |
|           |        | RT005   |     | RT005 | 72  | 2   | 1    | 6   | 13   | 1    | 5    | 1   |             |
|           |        | RT005   |     | RT005 | 89  | 2   | 1    | 6   | 1    | 1    | 21   | 1   |             |
|           |        | RT005   |     | RT005 | 90  | 2   | 1    | 16  | 1    | 1    | 5    | 1   |             |
|           |        | RT005   | 1   | RT005 | New | 2   | 1    | 6   | 8    | 1    | 5    | 1   | New (ST131) |
| RT009     | RT009  | RT009   | 1   | RT009 | 3   | 1   | 1    | 2   | 1    | 1    | 1    | 1   |             |
| RT010     |        | RT010   | 3   | RT010 | 15  | 1   | 1    | 6   | 1    | 8    | 5    | 1   |             |
| RT011     | RT011  |         |     | RT011 | 36  | 2   | 1    | 2   | 3    | 1    | 5    | 1   |             |
|           |        | RT011   |     | RT011 | 77  | 2   | 1    | 6   | 1    | 3    | 5    | 1   |             |
|           |        | RT011   | 1   | RT011 | New | 2   | 1    | 2   | 16   | 1    | 5    | 1   | New (ST138) |
| RT012     | RT012  | RT012   | 3   | RT012 | 54  | 1   | 4    | 7   | 1    | 1    | 3    | 3   |             |
|           |        | RT013   | 1   | RT013 | 45  | 4   | 1    | 6   | 1    | 1    | 5    | 1   |             |
|           |        | RT013   |     | RT013 | 71  | 4   | 1    | 6   | 1    | 1    | 15   | 1   |             |
|           |        | RT013   |     | RT013 | 78  | 4   | 1    | 6   | 1    | 1    | 1    | 1   |             |
| RT014     | RT014  | RT014   | 2   | RT014 | 2   | 1   | 1    | 2   | 1    | 5    | 3    | 1   |             |
|           |        | RT014   | 1   | RT014 | 13  | 1   | 1    | 6   | 1    | 5    | 3    | 1   |             |
| RT014     | RT014  |         |     | RT014 | 14  | 1   | 1    | 2   | 1    | 5    | 5    | 3   |             |
|           |        | RT014   | 1   | RT014 | 49  | 1   | 1    | 2   | 1    | 5    | 3    | 3   |             |
|           |        | RT014   |     | RT014 | 50  | 1   | 1    | 6   | 1    | 5    | 3    | 17  |             |
|           |        | RT014   | 1   | RT014 | New | 5   | 1    | 6   | 1    | 5    | 3    | 1   | New (ST132) |
| RT015     | RT015  | RT015   | 3   | RT015 | 10  | 2   | 1    | 2   | 1    | 1    | 3    | 1   |             |
|           |        | RT015   | 4   | RT015 | 44  | 2   | 5    | 2   | 1    | 1    | 3    | 1   |             |
| RT017     | RT017  | RT017   | 8   | RT017 | 37  | 3   | 7    | 3   | 8    | 6    | 9    | 11  |             |
|           |        | RT017   | 1   | RT017 | 86  | 3   | 7    | 3   | 8    | 6    | 19   | 11  |             |
| RT018     | RT018  | RT018   | 1   | RT018 | 17  | 1   | 1    | 2   | 1    | 1    | 5    | 3   |             |
| RT019     | RT019  |         |     | RT019 | 67  | 1   | 1    | 9   | 9    | 1    | 3    | 5   |             |
| RT020     | RT020  | RT020   | 2   | RT020 | 2   | 1   | 1    | 2   | 1    | 5    | 3    | 1   |             |
|           |        | RT020   |     | RT020 | 28  | 1   | 1    | 2   | 1    | 1    | 3    | 1   |             |
|           |        | RT020   |     | RT020 | 68  | 1   | 4    | 2   | 1    | 5    | 3    | 1   |             |
| RT021     | RT021  | RT021   | 1   | RT021 | 56  | 1   | 3    | 6   | 3    | 1    | 5    | 1   |             |
|           |        | RT021   |     | RT021 | 70  | 1   | 3    | 6   | 3    | 1    | 14   | 1   |             |
|           |        | RT022   | 1   | RT022 | 66  | 1   | 1    | 2   | 6    | 1    | 5    | 3   |             |
| RT023     | RT023  | RT023   | 4   | RT023 | 5   | 1   | 6    | 4   | 7    | 2    | 8    | 7   |             |
| RT023     | RT023  | RT023   | 1   | RT023 | 22  | 1   | 1    | 4   | 7    | 2    | 8    | 7   |             |
|           |        | RT023   |     | RT023 | 25  | 6   | 6    | 4   | 7    | 2    | 8    | 7   |             |
| RT026     | RT026  | RT026   | 1   | RT026 | 7   | 1   | 1    | 7   | 1    | 1    | 5    | 1   |             |
| RT027     | RT027  | RT027   | 53  | RT027 | 1   | 1   | 1    | 1   | 10   | 1    | 3    | 5   |             |
|           |        | RT029   | 1   | RT029 | New | 1   | 1    | 2   | 3    | 1    | 3    | 1   | New (ST137) |
|           |        | RT030   | 1   | RT030 | 48  | 1   | 1    | 2   | 1    | 1    | 5    | 1   |             |
|           |        | RT031   | 1   | RT031 | 29  | 1   | 1    | 2   | 16   | 1    | 3    | 1   |             |
|           |        | RT033   | 1   | RT033 | 11  | 5   | 8    | 5   | 11   | 9    | 11   | 8   |             |

|       |       |       |     |       |     |   |   |    |    |    |    |                |
|-------|-------|-------|-----|-------|-----|---|---|----|----|----|----|----------------|
| RT035 |       |       |     | RT035 | 40  | 4 | 5 | 6  | 1  | 3  | 1  | 1              |
| RT036 |       |       |     | RT036 | 1   | 1 | 1 | 1  | 10 | 1  | 3  | 5              |
|       |       | RT036 | 1   | RT036 | 62  | 1 | 1 | 1  | 9  | 1  | 3  | 1              |
|       | RT038 |       |     | RT038 | 48  | 1 | 1 | 2  | 1  | 1  | 5  | 1              |
| RT039 |       |       |     | RT039 | 26  | 1 | 1 | 6  | 1  | 4  | 3  | 4              |
|       |       | RT042 | 1   | RT042 | 6   | 2 | 1 | 6  | 1  | 1  | 5  | 1              |
| RT046 | RT046 | RT046 | 1   | RT046 | 35  | 2 | 5 | 8  | 1  | 1  | 3  | 6              |
|       |       | RT050 | 1   | RT050 | 6   | 2 | 1 | 6  | 1  | 1  | 5  | 1              |
| RT050 | RT050 | RT050 | 1   | RT050 | 16  | 1 | 1 | 2  | 6  | 1  | 3  | 1              |
| RT050 | RT050 | RT050 | 2   | RT050 | 18  | 1 | 1 | 2  | 5  | 1  | 3  | 1              |
|       |       | RT052 | 1   | RT052 | New | 2 | 1 | 6  | 16 | 1  | 5  | 13 New (ST136) |
|       | RT053 | RT053 | 1   | RT053 | 63  | 1 | 1 | 7  | 5  | 1  | 3  | 3              |
|       | RT054 | RT054 | 2   | RT054 | 43  | 1 | 7 | 6  | 1  | 1  | 5  | 6              |
| RT056 | RT056 |       |     | RT056 | 34  | 1 | 5 | 7  | 1  | 1  | 3  | 1              |
|       | RT056 |       |     | RT056 | 58  | 1 | 5 | 7  | 1  | 1  | 13 | 1              |
|       |       | RT059 | 1   | RT059 | 53  | 1 | 2 | 2  | 1  | 1  | 5  | 1              |
| RT060 |       |       |     | RT060 | 38  | 3 | 7 | 10 | 8  | 6  | 2  | 9              |
|       |       | RT062 | 1   | RT062 | 44  | 2 | 5 | 2  | 1  | 1  | 3  | 1              |
|       | RT062 |       |     | RT062 | 75  | 7 | 3 | 13 | 1  | 10 | 1  | 1              |
| RT063 |       |       |     | RT063 | 5   | 1 | 6 | 4  | 7  | 2  | 8  | 7              |
| RT064 |       | RT064 | 1   | RT064 | 33  | 1 | 1 | 2  | 1  | 6  | 5  | 3              |
|       |       |       |     | RT066 | 11  | 5 | 8 | 5  | 11 | 9  | 11 | 8              |
| RT067 |       |       |     | RT067 | 27  | 1 | 1 | 6  | 1  | 1  | 3  | 4              |
|       | RT070 |       |     | RT070 | 15  | 1 | 1 | 6  | 1  | 8  | 5  | 1              |
|       | RT070 | RT070 | 1   | RT070 | 55  | 1 | 1 | 6  | 6  | 1  | 12 | 12             |
| RT072 | RT072 |       |     | RT072 | 3   | 1 | 1 | 2  | 1  | 1  | 1  | 1              |
| RT072 |       |       |     | RT072 | 69  | 1 | 1 | 7  | 1  | 1  | 1  | 1              |
| RT076 | RT076 |       |     | RT076 | 2   | 1 | 1 | 2  | 1  | 5  | 3  | 1              |
| RT078 | RT078 | RT078 | 106 | RT078 | 11  | 5 | 8 | 5  | 11 | 9  | 11 | 8              |
| RT081 | RT081 | RT081 | 1   | RT081 | 9   | 1 | 1 | 6  | 1  | 1  | 6  | 1              |
|       |       | RT081 | 1   | RT081 | New | 2 | 1 | 2  | 1  | 1  | 1  | 3 New (ST139)  |
| RT085 |       | RT085 | 1   | RT085 | 39  | 3 | 7 | 10 | 8  | 7  | 2  | 10             |
|       |       | RT087 | 2   | RT087 | 46  | 4 | 1 | 6  | 1  | 1  | 10 | 1              |
|       |       | RT087 | 1   | RT087 | New | 4 | 1 | 6  | 1  | 1  | 10 | 12 New (ST145) |
|       |       | RT094 | 2   | RT094 | 12  | 1 | 1 | 6  | 4  | 3  | 5  | 1              |
|       | RT097 | RT097 | 1   | RT097 | 21  | 2 | 2 | 2  | 1  | 1  | 1  | 3              |
| RT103 | RT103 |       |     | RT103 | 53  | 1 | 2 | 2  | 1  | 1  | 5  | 1              |
|       | RT103 |       |     | RT103 | 73  | 1 | 2 | 12 | 1  | 1  | 5  | 1              |
|       | RT103 |       |     | RT103 | 76  | 1 | 1 | 6  | 1  | 1  | 1  | 1              |
|       | RT104 |       |     | RT104 | 48  | 1 | 1 | 2  | 1  | 1  | 5  | 1              |
|       | RT106 |       |     | RT106 | 41  | 1 | 1 | 9  | 9  | 1  | 3  | 2              |
| RT106 | RT106 | RT106 | 9   | RT106 | 42  | 1 | 1 | 2  | 1  | 1  | 7  | 1              |
|       |       | RT106 | 1   | RT106 | New | 1 | 1 | 2  | 8  | 1  | 7  | 1 New (ST135)  |
|       |       | RT107 | 1   | RT107 | New | 2 | 1 | 2  | 1  | 1  | 1  | 3 New (ST139)  |
| RT110 | RT110 |       |     | RT110 | 19  | 1 | 1 | 8  | 2  | 1  | 1  | 3              |
|       |       | RT111 | 1   | RT111 | New | 1 | 1 | 9  | 9  | 1  | 1  | 2 New (ST140)  |
| RT115 | RT115 |       |     | RT115 | 3   | 1 | 1 | 2  | 1  | 1  | 1  | 1              |
|       |       | RT116 | 1   | RT116 | 10  | 2 | 1 | 2  | 1  | 1  | 3  | 1              |
| RT118 |       | RT118 | 1   | RT118 | 42  | 1 | 1 | 2  | 1  | 1  | 7  | 1              |
|       |       | RT126 | 10  | RT126 | 11  | 5 | 8 | 5  | 11 | 9  | 11 | 8              |

|       |              |       |              |   |              |            |    |    |    |    |    |    |    |             |
|-------|--------------|-------|--------------|---|--------------|------------|----|----|----|----|----|----|----|-------------|
|       |              |       | <b>RT127</b> | 3 | <b>RT127</b> | <b>11</b>  | 5  | 8  | 5  | 11 | 9  | 11 | 8  |             |
| RT129 | RT129        |       |              |   | RT129        | <b>13</b>  | 1  | 1  | 6  | 1  | 5  | 3  | 1  |             |
|       |              |       | <b>RT135</b> | 1 | <b>RT135</b> | <b>41</b>  | 1  | 1  | 9  | 9  | 1  | 3  | 2  |             |
| RT137 | RT137        |       |              |   | RT137        | <b>4</b>   | 1  | 2  | 2  | 1  | 1  | 5  | 3  |             |
|       |              |       |              |   | RT138        | <b>23</b>  | 3  | 7  | 14 | 14 | 11 | 16 | 15 |             |
|       | RT139        | RT139 |              | 1 | RT139        | <b>52</b>  | 1  | 1  | 2  | 6  | 1  | 12 | 1  |             |
| RT140 | RT140        | RT140 |              | 1 | RT140        | <b>26</b>  | 1  | 1  | 6  | 1  | 4  | 3  | 4  |             |
| RT153 |              |       |              |   | RT153        | <b>32</b>  | 1  | 1  | 11 | 1  | 1  | 3  | 2  |             |
| RT159 |              |       |              |   | RT159        | <b>8</b>   | 1  | 1  | 2  | 6  | 1  | 5  | 1  |             |
| RT174 | RT174        |       |              |   | RT174        | <b>42</b>  | 1  | 1  | 2  | 1  | 1  | 7  | 1  |             |
|       |              |       | <b>RT176</b> | 2 | <b>RT176</b> | <b>1</b>   | 1  | 1  | 1  | 10 | 1  | 3  | 5  |             |
| RT186 | RT186        | RT186 |              | 1 | RT186        | <b>51</b>  | 1  | 1  | 2  | 6  | 1  | 7  | 6  |             |
| RT191 |              |       |              |   | RT191        | <b>46</b>  | 4  | 1  | 6  | 1  | 1  | 10 | 1  |             |
|       | RT194        |       |              |   | RT194        | <b>41</b>  | 1  | 1  | 9  | 9  | 1  | 3  | 2  |             |
|       |              |       | <b>RT196</b> | 1 | <b>RT196</b> | <b>New</b> | 1  | 1  | 2  | 2  | 1  | 5  | 3  | New (ST144) |
| RT202 |              |       |              |   | RT202        | <b>20</b>  | 1  | 1  | 8  | 1  | 1  | 4  | 3  |             |
|       | RT202        |       |              |   | RT202        | <b>24</b>  | 1  | 1  | 8  | 12 | 1  | 4  | 3  |             |
|       |              |       | <b>RT212</b> | 1 | <b>RT212</b> | <b>5</b>   | 1  | 6  | 4  | 7  | 2  | 8  | 7  |             |
|       | RT216        | RT216 |              | 1 | RT216        | <b>33</b>  | 1  | 1  | 2  | 1  | 6  | 5  | 3  |             |
| RT220 | RT220        |       |              |   | RT220        | <b>2</b>   | 1  | 1  | 2  | 1  | 5  | 3  | 1  |             |
|       | RT224        |       |              |   | RT224        | <b>65</b>  | 1  | 1  | 7  | 3  | 1  | 5  | 6  |             |
| RT225 | RT225        |       |              |   | RT225        | <b>12</b>  | 1  | 1  | 6  | 4  | 3  | 5  | 1  |             |
|       | RT228        |       |              |   | RT228        | <b>92</b>  | 1  | 1  | 2  | 3  | 1  | 5  | 1  |             |
|       |              |       | <b>RT237</b> | 5 | <b>RT237</b> | <b>11</b>  | 5  | 8  | 5  | 11 | 9  | 11 | 8  |             |
|       |              |       | <b>RT239</b> | 1 | <b>RT239</b> | <b>New</b> | 10 | 8  | 5  | 11 | 9  | 11 | 8  | New (ST147) |
|       |              |       | <b>RT243</b> | 1 | <b>RT243</b> | <b>New</b> | 2  | 1  | 2  | 1  | 1  | 1  | 3  | New (ST139) |
| RT249 |              |       |              |   | RT249        | <b>51</b>  | 1  | 1  | 2  | 6  | 1  | 7  | 6  |             |
|       |              |       | <b>RT259</b> | 1 | <b>RT259</b> | <b>New</b> | 1  | 3  | 7  | 1  | 3  | 1  | 6  | New (ST141) |
| RT262 | RT262        | 2     |              |   | RT262        | <b>3</b>   | 1  | 1  | 2  | 1  | 1  | 1  | 1  |             |
|       | RT262        | 1     |              |   | RT262        | <b>New</b> | 1  | 11 | 6  | 16 | 1  | 1  | 1  | New (ST143) |
|       | <b>RT264</b> | 1     |              |   | <b>RT264</b> | <b>New</b> | 8  | 7  | 14 | 8  | 6  | 25 | 15 | New (ST142) |
|       | <b>RT268</b> | 1     |              |   | <b>RT268</b> | <b>3</b>   | 1  | 1  | 2  | 1  | 1  | 1  | 1  |             |
|       | <b>RT271</b> | 1     |              |   | <b>RT271</b> | <b>6</b>   | 2  | 1  | 6  | 1  | 1  | 5  | 1  |             |
|       | <b>RT274</b> | 1     |              |   | <b>RT274</b> | <b>New</b> | 1  | 1  | 7  | 1  | 1  | 3  | 3  | New (ST133) |
|       | <b>RT280</b> | 1     |              |   | <b>RT280</b> | <b>11</b>  | 5  | 8  | 5  | 11 | 9  | 11 | 8  |             |
|       | <b>RT281</b> | 1     |              |   | <b>RT281</b> | <b>11</b>  | 5  | 8  | 5  | 11 | 9  | 11 | 8  |             |
|       | <b>RT283</b> | 1     |              |   | <b>RT283</b> | <b>New</b> | 1  | 3  | 2  | 15 | 1  | 3  | 3  | New (ST134) |
|       | <b>RT291</b> | 1     |              |   | <b>RT291</b> | <b>New</b> | 5  | 8  | 5  | 11 | 9  | 11 | 20 | New (ST148) |
| RT305 |              |       |              |   | RT305        | <b>3</b>   | 1  | 1  | 2  | 1  | 1  | 1  | 1  |             |
| RT316 |              |       |              |   | RT316        | <b>59</b>  | 1  | 3  | 6  | 15 | 1  | 17 | 1  |             |
| RT319 |              |       |              |   | RT319        | <b>74</b>  | 1  | 1  | 13 | 1  | 3  | 1  | 14 |             |
| RT320 |              |       |              |   | RT320        | <b>46</b>  | 4  | 1  | 6  | 1  | 1  | 10 | 1  |             |
| RT321 |              |       |              |   | RT321        | <b>41</b>  | 1  | 1  | 9  | 9  | 1  | 3  | 2  |             |
| RT323 |              |       |              |   | RT323        | <b>31</b>  | 1  | 5  | 7  | 6  | 1  | 1  | 1  |             |
| RT326 |              |       |              |   | RT326        | <b>91</b>  | 1  | 1  | 6  | 6  | 1  | 6  | 1  |             |
| RT336 |              |       |              |   | RT336        | <b>60</b>  | 1  | 3  | 15 | 15 | 1  | 3  | 1  |             |
|       |              |       |              |   |              | <b>30</b>  | 8  | 7  | 14 | 8  | 6  | 16 | 15 |             |
|       |              |       |              |   |              | <b>47</b>  | 1  | 1  | 11 | 17 | 1  | 3  | 2  |             |
|       |              |       |              |   |              | <b>61</b>  | 1  | 5  | 11 | 1  | 1  | 3  | 2  |             |
|       |              |       |              |   |              | <b>64</b>  | 1  | 1  | 6  | 1  | 1  | 13 | 1  |             |

|            |   |    |    |    |    |    |    |
|------------|---|----|----|----|----|----|----|
| <b>79</b>  | 1 | 3  | 2  | 1  | 1  | 1  | 16 |
| <b>80</b>  | 1 | 1  | 13 | 1  | 3  | 1  | 3  |
| <b>81</b>  | 3 | 1  | 3  | 8  | 6  | 9  | 11 |
| <b>82</b>  | 1 | 1  | 6  | 1  | 1  | 1  | 3  |
| <b>83</b>  | 1 | 1  | 6  | 1  | 1  | 3  | 1  |
| <b>84</b>  | 1 | 9  | 2  | 1  | 1  | 1  | 1  |
| <b>85</b>  | 1 | 10 | 7  | 1  | 1  | 3  | 3  |
| <b>86</b>  | 3 | 7  | 3  | 8  | 6  | 19 | 11 |
| <b>87</b>  | 3 | 7  | 3  | 8  | 6  | 20 | 10 |
| <b>88</b>  | 9 | 7  | 3  | 8  | 6  | 18 | 10 |
| <b>93</b>  | 3 | 7  | 3  | 8  | 11 | 20 | 10 |
| <b>94</b>  | 2 | 1  | 6  | 1  | 1  | 10 | 1  |
| <b>95</b>  | 1 | 5  | 11 | 17 | 1  | 3  | 1  |
| <b>96</b>  | 1 | 6  | 4  | 7  | 12 | 8  | 7  |
| <b>97</b>  | 1 | 1  | 11 | 1  | 1  | 22 | 1  |
| <b>98</b>  | 1 | 1  | 2  | 6  | 1  | 1  | 3  |
| <b>99</b>  | 1 | 11 | 6  | 6  | 1  | 12 | 12 |
| <b>100</b> | 1 | 1  | 6  | 19 | 2  | 24 | 1  |
| <b>101</b> | 1 | 2  | 2  | 1  | 1  | 23 | 1  |
| <b>102</b> | 1 | 1  | 2  | 1  | 5  | 5  | 1  |
| <b>103</b> | 1 | 1  | 2  | 15 | 8  | 5  | 3  |
| <b>104</b> | 1 | 1  | 13 | 1  | 1  | 1  | 6  |
| <b>105</b> | 2 | 2  | 4  | 1  | 1  | 1  | 3  |
| <b>106</b> | 2 | 1  | 2  | 10 | 1  | 5  | 1  |
| <b>107</b> | 4 | 1  | 6  | 1  | 3  | 1  | 1  |
| <b>108</b> | 1 | 1  | 6  | 1  | 8  | 5  | 5  |
| <b>109</b> | 3 | 12 | 10 | 18 | 6  | 18 | 15 |
| <b>110</b> | 1 | 1  | 2  | 1  | 13 | 3  | 1  |
| <b>111</b> | 1 | 1  | 2  | 1  | 1  | 3  | 3  |
| <b>112</b> | 1 | 1  | 7  | 3  | 1  | 5  | 3  |
| <b>113</b> | 2 | 1  | 17 | 1  | 1  | 5  | 1  |
| <b>114</b> | 1 | 1  | 9  | 9  | 1  | 1  | 18 |
| <b>115</b> | 1 | 1  | 2  | 6  | 1  | 7  | 3  |
| <b>116</b> | 1 | 1  | 9  | 9  | 1  | 22 | 5  |
| <b>117</b> | 1 | 1  | 7  | 1  | 2  | 5  | 1  |
| <b>118</b> | 1 | 13 | 2  | 1  | 1  | 1  | 19 |
| <b>119</b> | 1 | 1  | 2  | 20 | 1  | 5  | 1  |
| <b>120</b> | 1 | 1  | 1  | 1  | 5  | 3  | 1  |
| <b>121</b> | 3 | 7  | 3  | 8  | 7  | 2  | 10 |
| <b>122</b> | 1 | 1  | 4  | 1  | 1  | 1  | 10 |
| <b>123</b> | 1 | 14 | 9  | 1  | 1  | 3  | 2  |

| Griffiths | Dingle | Stabler | Nos | Con   | ST | adk | atpA | dxr | glyA | recA | sodA | tpi |
|-----------|--------|---------|-----|-------|----|-----|------|-----|------|------|------|-----|
| RT027     | RT027  | RT027   | 53  | RT027 | 1  | 1   | 1    | 1   | 10   | 1    | 3    | 5   |
| RT036     |        |         |     | RT036 | 1  | 1   | 1    | 1   | 10   | 1    | 3    | 5   |
|           |        | RT176   | 2   | RT176 | 1  | 1   | 1    | 1   | 10   | 1    | 3    | 5   |
|           |        | RT002   | 1   | RT002 | 2  | 1   | 1    | 2   | 1    | 5    | 3    | 1   |
| RT014     | RT014  | RT014   | 2   | RT014 | 2  | 1   | 1    | 2   | 1    | 5    | 3    | 1   |
| RT020     | RT020  | RT020   | 2   | RT020 | 2  | 1   | 1    | 2   | 1    | 5    | 3    | 1   |
| RT076     | RT076  |         |     | RT076 | 2  | 1   | 1    | 2   | 1    | 5    | 3    | 1   |
| RT220     | RT220  |         |     | RT220 | 2  | 1   | 1    | 2   | 1    | 5    | 3    | 1   |
| RT001     | RT001  | RT001   | 15  | RT001 | 3  | 1   | 1    | 2   | 1    | 1    | 1    | 1   |
| RT009     | RT009  | RT009   | 1   | RT009 | 3  | 1   | 1    | 2   | 1    | 1    | 1    | 1   |
| RT072     | RT072  |         |     | RT072 | 3  | 1   | 1    | 2   | 1    | 1    | 1    | 1   |
| RT115     | RT115  |         |     | RT115 | 3  | 1   | 1    | 2   | 1    | 1    | 1    | 1   |
|           | RT262  | RT262   | 2   | RT262 | 3  | 1   | 1    | 2   | 1    | 1    | 1    | 1   |
|           | RT268  | RT268   | 1   | RT268 | 3  | 1   | 1    | 2   | 1    | 1    | 1    | 1   |
|           | RT305  |         |     | RT305 | 3  | 1   | 1    | 2   | 1    | 1    | 1    | 1   |
| RT137     | RT137  |         |     | RT137 | 4  | 1   | 2    | 2   | 1    | 1    | 5    | 3   |
| RT023     | RT023  | RT023   | 4   | RT023 | 5  | 1   | 6    | 4   | 7    | 2    | 8    | 7   |
| RT063     |        |         |     | RT063 | 5  | 1   | 6    | 4   | 7    | 2    | 8    | 7   |
|           | RT212  | RT212   | 1   | RT212 | 5  | 1   | 6    | 4   | 7    | 2    | 8    | 7   |
| RT005     | RT005  | RT005   | 2   | RT005 | 6  | 2   | 1    | 6   | 1    | 1    | 5    | 1   |
|           | RT042  | RT042   | 1   | RT042 | 6  | 2   | 1    | 6   | 1    | 1    | 5    | 1   |
|           | RT050  | RT050   | 1   | RT050 | 6  | 2   | 1    | 6   | 1    | 1    | 5    | 1   |
|           | RT271  | RT271   | 1   | RT271 | 6  | 2   | 1    | 6   | 1    | 1    | 5    | 1   |
| RT026     | RT026  | RT026   | 1   | RT026 | 7  | 1   | 1    | 7   | 1    | 1    | 5    | 1   |
| RT002     | RT002  | RT002   | 10  | RT002 | 8  | 1   | 1    | 2   | 6    | 1    | 5    | 1   |
| RT159     |        |         |     | RT159 | 8  | 1   | 1    | 2   | 6    | 1    | 5    | 1   |
| RT081     | RT081  | RT081   | 1   | RT081 | 9  | 1   | 1    | 6   | 1    | 1    | 6    | 1   |
| RT015     | RT015  | RT015   | 3   | RT015 | 10 | 2   | 1    | 2   | 1    | 1    | 3    | 1   |
|           | RT116  | RT116   | 1   | RT116 | 10 | 2   | 1    | 2   | 1    | 1    | 3    | 1   |
|           | RT033  | RT066   | 1   | RT066 | 11 | 5   | 8    | 5   | 11   | 9    | 11   | 8   |
| RT078     | RT078  | RT078   | 106 | RT078 | 11 | 5   | 8    | 5   | 11   | 9    | 11   | 8   |
|           | RT126  | RT126   | 10  | RT126 | 11 | 5   | 8    | 5   | 11   | 9    | 11   | 8   |
|           | RT127  | RT127   | 3   | RT127 | 11 | 5   | 8    | 5   | 11   | 9    | 11   | 8   |
|           | RT237  | RT237   | 5   | RT237 | 11 | 5   | 8    | 5   | 11   | 9    | 11   | 8   |
|           | RT280  | RT280   | 1   | RT280 | 11 | 5   | 8    | 5   | 11   | 9    | 11   | 8   |
|           | RT281  | RT281   | 1   | RT281 | 11 | 5   | 8    | 5   | 11   | 9    | 11   | 8   |
| RT003     | RT003  |         |     | RT003 | 12 | 1   | 1    | 6   | 4    | 3    | 5    | 1   |
|           | RT094  | RT094   | 2   | RT094 | 12 | 1   | 1    | 6   | 4    | 3    | 5    | 1   |
| RT225     | RT225  |         |     | RT225 | 12 | 1   | 1    | 6   | 4    | 3    | 5    | 1   |
|           | RT014  | RT014   | 1   | RT014 | 13 | 1   | 1    | 6   | 1    | 5    | 3    | 1   |
| RT129     | RT129  |         |     | RT129 | 13 | 1   | 1    | 6   | 1    | 5    | 3    | 1   |
| RT014     | RT014  |         |     | RT014 | 14 | 1   | 1    | 2   | 1    | 5    | 5    | 3   |
| RT010     |        | RT010   | 3   | RT010 | 15 | 1   | 1    | 6   | 1    | 8    | 5    | 1   |
|           | RT070  |         |     | RT070 | 15 | 1   | 1    | 6   | 1    | 8    | 5    | 1   |
| RT050     | RT050  | RT050   | 1   | RT050 | 16 | 1   | 1    | 2   | 6    | 1    | 3    | 1   |
| RT018     | RT018  | RT018   | 1   | RT018 | 17 | 1   | 1    | 2   | 1    | 1    | 5    | 3   |
| RT050     | RT050  | RT050   | 2   | RT050 | 18 | 1   | 1    | 2   | 5    | 1    | 3    | 1   |
| RT110     | RT110  |         |     | RT110 | 19 | 1   | 1    | 8   | 2    | 1    | 1    | 3   |
| RT202     |        |         |     | RT202 | 20 | 1   | 1    | 8   | 1    | 1    | 4    | 3   |

|       |       |       |   |       |           |   |   |    |    |    |    |    |
|-------|-------|-------|---|-------|-----------|---|---|----|----|----|----|----|
|       | RT097 | RT097 | 1 | RT097 | <b>21</b> | 2 | 2 | 2  | 1  | 1  | 1  | 3  |
| RT023 | RT023 | RT023 | 1 | RT023 | <b>22</b> | 1 | 1 | 4  | 7  | 2  | 8  | 7  |
|       | RT138 |       |   | RT138 | <b>23</b> | 3 | 7 | 14 | 14 | 11 | 16 | 15 |
|       | RT202 |       |   | RT202 | <b>24</b> | 1 | 1 | 8  | 12 | 1  | 4  | 3  |
|       | RT023 |       |   | RT023 | <b>25</b> | 6 | 6 | 4  | 7  | 2  | 8  | 7  |
| RT039 |       |       |   | RT039 | <b>26</b> | 1 | 1 | 6  | 1  | 4  | 3  | 4  |
| RT140 | RT140 | RT140 | 1 | RT140 | <b>26</b> | 1 | 1 | 6  | 1  | 4  | 3  | 4  |
| RT067 |       |       |   | RT067 | <b>27</b> | 1 | 1 | 6  | 1  | 1  | 3  | 4  |
|       | RT020 |       |   | RT020 | <b>28</b> | 1 | 1 | 2  | 1  | 1  | 3  | 1  |
|       | RT031 | 1     |   | RT031 | <b>29</b> | 1 | 1 | 2  | 16 | 1  | 3  | 1  |
|       |       |       |   |       | <b>30</b> | 8 | 7 | 14 | 8  | 6  | 16 | 15 |
|       | RT323 |       |   | RT323 | <b>31</b> | 1 | 5 | 7  | 6  | 1  | 1  | 1  |
| RT153 |       |       |   | RT153 | <b>32</b> | 1 | 1 | 11 | 1  | 1  | 3  | 2  |
| RT064 | RT064 | 1     |   | RT064 | <b>33</b> | 1 | 1 | 2  | 1  | 6  | 5  | 3  |
|       | RT216 | RT216 | 1 | RT216 | <b>33</b> | 1 | 1 | 2  | 1  | 6  | 5  | 3  |
| RT056 | RT056 |       |   | RT056 | <b>34</b> | 1 | 5 | 7  | 1  | 1  | 3  | 1  |
|       | RT002 | 4     |   | RT002 | <b>35</b> | 2 | 5 | 8  | 1  | 1  | 3  | 6  |
| RT046 | RT046 | RT046 | 1 | RT046 | <b>35</b> | 2 | 5 | 8  | 1  | 1  | 3  | 6  |
| RT011 | RT011 |       |   | RT011 | <b>36</b> | 2 | 1 | 2  | 3  | 1  | 5  | 1  |
| RT017 | RT017 | RT017 | 8 | RT017 | <b>37</b> | 3 | 7 | 3  | 8  | 6  | 9  | 11 |
| RT060 |       |       |   | RT060 | <b>38</b> | 3 | 7 | 10 | 8  | 6  | 2  | 9  |
| RT085 | RT085 | 1     |   | RT085 | <b>39</b> | 3 | 7 | 10 | 8  | 7  | 2  | 10 |
| RT035 |       |       |   | RT035 | <b>40</b> | 4 | 5 | 6  | 1  | 3  | 1  | 1  |
|       | RT106 |       |   | RT106 | <b>41</b> | 1 | 1 | 9  | 9  | 1  | 3  | 2  |
|       | RT135 | 1     |   | RT135 | <b>41</b> | 1 | 1 | 9  | 9  | 1  | 3  | 2  |
|       | RT194 |       |   | RT194 | <b>41</b> | 1 | 1 | 9  | 9  | 1  | 3  | 2  |
|       | RT321 |       |   | RT321 | <b>41</b> | 1 | 1 | 9  | 9  | 1  | 3  | 2  |
| RT106 | RT106 | RT106 | 9 | RT106 | <b>42</b> | 1 | 1 | 2  | 1  | 1  | 7  | 1  |
| RT118 | RT118 | 1     |   | RT118 | <b>42</b> | 1 | 1 | 2  | 1  | 1  | 7  | 1  |
| RT174 | RT174 |       |   | RT174 | <b>42</b> | 1 | 1 | 2  | 1  | 1  | 7  | 1  |
|       | RT054 | RT054 | 2 | RT054 | <b>43</b> | 1 | 7 | 6  | 1  | 1  | 5  | 6  |
|       | RT015 | RT015 | 4 | RT015 | <b>44</b> | 2 | 5 | 2  | 1  | 1  | 3  | 1  |
|       | RT062 | 1     |   | RT062 | <b>44</b> | 2 | 5 | 2  | 1  | 1  | 3  | 1  |
|       | RT013 | RT013 | 1 | RT013 | <b>45</b> | 4 | 1 | 6  | 1  | 1  | 5  | 1  |
|       | RT087 | 2     |   | RT087 | <b>46</b> | 4 | 1 | 6  | 1  | 1  | 10 | 1  |
| RT191 |       |       |   | RT191 | <b>46</b> | 4 | 1 | 6  | 1  | 1  | 10 | 1  |
|       | RT320 |       |   | RT320 | <b>46</b> | 4 | 1 | 6  | 1  | 1  | 10 | 1  |
|       |       |       |   |       | <b>47</b> | 1 | 1 | 11 | 17 | 1  | 3  | 2  |
|       | RT002 | 1     |   | RT002 | <b>48</b> | 1 | 1 | 2  | 1  | 1  | 5  | 1  |
|       | RT030 | 1     |   | RT030 | <b>48</b> | 1 | 1 | 2  | 1  | 1  | 5  | 1  |
|       | RT038 |       |   | RT038 | <b>48</b> | 1 | 1 | 2  | 1  | 1  | 5  | 1  |
|       | RT104 |       |   | RT104 | <b>48</b> | 1 | 1 | 2  | 1  | 1  | 5  | 1  |
|       | RT014 | RT014 | 1 | RT014 | <b>49</b> | 1 | 1 | 2  | 1  | 5  | 3  | 3  |
|       | RT014 |       |   | RT014 | <b>50</b> | 1 | 1 | 6  | 1  | 5  | 3  | 17 |
| RT186 | RT186 | RT186 | 1 | RT186 | <b>51</b> | 1 | 1 | 2  | 6  | 1  | 7  | 6  |
|       | RT249 |       |   | RT249 | <b>51</b> | 1 | 1 | 2  | 6  | 1  | 7  | 6  |
|       | RT139 | RT139 | 1 | RT139 | <b>52</b> | 1 | 1 | 2  | 6  | 1  | 12 | 1  |
|       | RT059 | 1     |   | RT059 | <b>53</b> | 1 | 2 | 2  | 1  | 1  | 5  | 1  |
| RT103 | RT103 |       |   | RT103 | <b>53</b> | 1 | 2 | 2  | 1  | 1  | 5  | 1  |
| RT012 | RT012 | RT012 | 3 | RT012 | <b>54</b> | 1 | 4 | 7  | 1  | 1  | 3  | 3  |

|       |       |       |   |       |     |   |    |    |    |    |    |    |
|-------|-------|-------|---|-------|-----|---|----|----|----|----|----|----|
|       | RT070 | RT070 | 1 | RT070 | 55  | 1 | 1  | 6  | 6  | 1  | 12 | 12 |
| RT021 | RT021 | RT021 | 1 | RT021 | 56  | 1 | 3  | 6  | 3  | 1  | 5  | 1  |
|       | RT003 | RT003 | 1 | RT003 | 57  | 1 | 1  | 6  | 4  | 3  | 5  | 13 |
|       | RT056 |       |   | RT056 | 58  | 1 | 5  | 7  | 1  | 1  | 13 | 1  |
|       | RT316 |       |   | RT316 | 59  | 1 | 3  | 6  | 15 | 1  | 17 | 1  |
|       | RT336 |       |   | RT336 | 60  | 1 | 3  | 15 | 15 | 1  | 3  | 1  |
|       |       |       |   |       | 61  | 1 | 5  | 11 | 1  | 1  | 3  | 2  |
|       | RT036 | 1     |   | RT036 | 62  | 1 | 1  | 1  | 9  | 1  | 3  | 1  |
|       | RT053 | RT053 | 1 | RT053 | 63  | 1 | 1  | 7  | 5  | 1  | 3  | 3  |
|       |       |       |   |       | 64  | 1 | 1  | 6  | 1  | 1  | 13 | 1  |
|       | RT224 |       |   | RT224 | 65  | 1 | 1  | 7  | 3  | 1  | 5  | 6  |
|       | RT022 | RT022 | 1 | RT022 | 66  | 1 | 1  | 2  | 6  | 1  | 5  | 3  |
| RT019 | RT019 |       |   | RT019 | 67  | 1 | 1  | 9  | 9  | 1  | 3  | 5  |
|       | RT020 |       |   | RT020 | 68  | 1 | 4  | 2  | 1  | 5  | 3  | 1  |
| RT072 |       |       |   | RT072 | 69  | 1 | 1  | 7  | 1  | 1  | 1  | 1  |
|       | RT021 |       |   | RT021 | 70  | 1 | 3  | 6  | 3  | 1  | 14 | 1  |
|       | RT013 |       |   | RT013 | 71  | 4 | 1  | 6  | 1  | 1  | 15 | 1  |
|       | RT005 |       |   | RT005 | 72  | 2 | 1  | 6  | 13 | 1  | 5  | 1  |
|       | RT103 |       |   | RT103 | 73  | 1 | 2  | 12 | 1  | 1  | 5  | 1  |
|       | RT319 |       |   | RT319 | 74  | 1 | 1  | 13 | 1  | 3  | 1  | 14 |
|       | RT062 |       |   | RT062 | 75  | 7 | 3  | 13 | 1  | 10 | 1  | 1  |
|       | RT103 |       |   | RT103 | 76  | 1 | 1  | 6  | 1  | 1  | 1  | 1  |
|       | RT011 |       |   | RT011 | 77  | 2 | 1  | 6  | 1  | 3  | 5  | 1  |
|       | RT013 |       |   | RT013 | 78  | 4 | 1  | 6  | 1  | 1  | 1  | 1  |
|       |       |       |   |       | 79  | 1 | 3  | 2  | 1  | 1  | 1  | 16 |
|       |       |       |   |       | 80  | 1 | 1  | 13 | 1  | 3  | 1  | 3  |
|       |       |       |   |       | 81  | 3 | 1  | 3  | 8  | 6  | 9  | 11 |
|       |       |       |   |       | 82  | 1 | 1  | 6  | 1  | 1  | 1  | 3  |
|       |       |       |   |       | 83  | 1 | 1  | 6  | 1  | 1  | 3  | 1  |
|       |       |       |   |       | 84  | 1 | 9  | 2  | 1  | 1  | 1  | 1  |
|       |       |       |   |       | 85  | 1 | 10 | 7  | 1  | 1  | 3  | 3  |
|       |       | RT017 | 1 | RT017 | 86  | 3 | 7  | 3  | 8  | 6  | 19 | 11 |
|       |       |       |   |       | 86  | 3 | 7  | 3  | 8  | 6  | 19 | 11 |
|       |       |       |   |       | 87  | 3 | 7  | 3  | 8  | 6  | 20 | 10 |
|       |       |       |   |       | 88  | 9 | 7  | 3  | 8  | 6  | 18 | 10 |
|       | RT005 |       |   | RT005 | 89  | 2 | 1  | 6  | 1  | 1  | 21 | 1  |
|       | RT005 |       |   | RT005 | 90  | 2 | 1  | 16 | 1  | 1  | 5  | 1  |
|       | RT326 |       |   | RT326 | 91  | 1 | 1  | 6  | 6  | 1  | 6  | 1  |
|       | RT228 |       |   | RT228 | 92  | 1 | 1  | 2  | 3  | 1  | 5  | 1  |
|       |       |       |   |       | 93  | 3 | 7  | 3  | 8  | 11 | 20 | 10 |
|       |       |       |   |       | 94  | 2 | 1  | 6  | 1  | 1  | 10 | 1  |
|       |       |       |   |       | 95  | 1 | 5  | 11 | 17 | 1  | 3  | 1  |
|       |       |       |   |       | 96  | 1 | 6  | 4  | 7  | 12 | 8  | 7  |
|       |       |       |   |       | 97  | 1 | 1  | 11 | 1  | 1  | 22 | 1  |
|       |       |       |   |       | 98  | 1 | 1  | 2  | 6  | 1  | 1  | 3  |
|       |       |       |   |       | 99  | 1 | 11 | 6  | 6  | 1  | 12 | 12 |
|       |       |       |   |       | 100 | 1 | 1  | 6  | 19 | 2  | 24 | 1  |
|       |       |       |   |       | 101 | 1 | 2  | 2  | 1  | 1  | 23 | 1  |
|       |       |       |   |       | 102 | 1 | 1  | 2  | 1  | 5  | 5  | 1  |
|       |       |       |   |       | 103 | 1 | 1  | 2  | 15 | 8  | 5  | 3  |

|       |   |       |     |            |    |    |    |    |    |    |             |
|-------|---|-------|-----|------------|----|----|----|----|----|----|-------------|
|       |   |       |     | <b>104</b> | 1  | 1  | 13 | 1  | 1  | 1  | 6           |
|       |   |       |     | <b>105</b> | 2  | 2  | 4  | 1  | 1  | 1  | 3           |
|       |   |       |     | <b>106</b> | 2  | 1  | 2  | 10 | 1  | 5  | 1           |
|       |   |       |     | <b>107</b> | 4  | 1  | 6  | 1  | 3  | 1  | 1           |
|       |   |       |     | <b>108</b> | 1  | 1  | 6  | 1  | 8  | 5  | 5           |
|       |   |       |     | <b>109</b> | 3  | 12 | 10 | 18 | 6  | 18 | 15          |
|       |   |       |     | <b>110</b> | 1  | 1  | 2  | 1  | 13 | 3  | 1           |
|       |   |       |     | <b>111</b> | 1  | 1  | 2  | 1  | 1  | 3  | 3           |
|       |   |       |     | <b>112</b> | 1  | 1  | 7  | 3  | 1  | 5  | 3           |
|       |   |       |     | <b>113</b> | 2  | 1  | 17 | 1  | 1  | 5  | 1           |
|       |   |       |     | <b>114</b> | 1  | 1  | 9  | 9  | 1  | 1  | 18          |
|       |   |       |     | <b>115</b> | 1  | 1  | 2  | 6  | 1  | 7  | 3           |
|       |   |       |     | <b>116</b> | 1  | 1  | 9  | 9  | 1  | 22 | 5           |
|       |   |       |     | <b>117</b> | 1  | 1  | 7  | 1  | 2  | 5  | 1           |
|       |   |       |     | <b>118</b> | 1  | 13 | 2  | 1  | 1  | 1  | 19          |
|       |   |       |     | <b>119</b> | 1  | 1  | 2  | 20 | 1  | 5  | 1           |
|       |   |       |     | <b>120</b> | 1  | 1  | 1  | 1  | 5  | 3  | 1           |
|       |   |       |     | <b>121</b> | 3  | 7  | 3  | 8  | 7  | 2  | 10          |
|       |   |       |     | <b>122</b> | 1  | 1  | 4  | 1  | 1  | 1  | 10          |
|       |   |       |     | <b>123</b> | 1  | 14 | 9  | 1  | 1  | 3  | 2           |
| RT002 | 1 | RT002 | New | 1          | 1  | 2  | 6  | 1  | 5  | 4  | New (ST146) |
| RT005 | 1 | RT005 | New | 2          | 1  | 6  | 8  | 1  | 5  | 1  | New (ST131) |
| RT011 | 1 | RT011 | New | 2          | 1  | 2  | 16 | 1  | 5  | 1  | New (ST138) |
| RT014 | 1 | RT014 | New | 5          | 1  | 6  | 1  | 5  | 3  | 1  | New (ST132) |
| RT029 | 1 | RT029 | New | 1          | 1  | 2  | 3  | 1  | 3  | 1  | New (ST137) |
| RT052 | 1 | RT052 | New | 2          | 1  | 6  | 16 | 1  | 5  | 13 | New (ST136) |
| RT081 | 1 | RT081 | New | 2          | 1  | 2  | 1  | 1  | 1  | 3  | New (ST139) |
| RT087 | 1 | RT087 | New | 4          | 1  | 6  | 1  | 1  | 10 | 12 | New (ST145) |
| RT106 | 1 | RT106 | New | 1          | 1  | 2  | 8  | 1  | 7  | 1  | New (ST135) |
| RT107 | 1 | RT107 | New | 2          | 1  | 2  | 1  | 1  | 1  | 3  | New (ST139) |
| RT111 | 1 | RT111 | New | 1          | 1  | 9  | 9  | 1  | 1  | 2  | New (ST140) |
| RT196 | 1 | RT196 | New | 1          | 1  | 2  | 2  | 1  | 5  | 3  | New (ST144) |
| RT239 | 1 | RT239 | New | 10         | 8  | 5  | 11 | 9  | 11 | 8  | New (ST147) |
| RT243 | 1 | RT243 | New | 2          | 1  | 2  | 1  | 1  | 1  | 3  | New (ST139) |
| RT259 | 1 | RT259 | New | 1          | 3  | 7  | 1  | 3  | 1  | 6  | New (ST141) |
| RT262 | 1 | RT262 | New | 1          | 11 | 6  | 16 | 1  | 1  | 1  | New (ST143) |
| RT264 | 1 | RT264 | New | 8          | 7  | 14 | 8  | 6  | 25 | 15 | New (ST142) |
| RT274 | 1 | RT274 | New | 1          | 1  | 7  | 1  | 1  | 3  | 3  | New (ST133) |
| RT283 | 1 | RT283 | New | 1          | 3  | 2  | 15 | 1  | 3  | 3  | New (ST134) |
| RT291 | 1 | RT291 | New | 5          | 8  | 5  | 11 | 9  | 11 | 20 | New (ST148) |
