# Supplementary material for: Macro and Micro Diversity of Clostridium difficile Isolates from Diverse Sources and Geographical Locations
Source: PubMed Central journal article supplement (PMC3292544; doi:10.1371/journal.pone.0031559), 2012-03-02
Supplement: pone.0031559.s013.pdf [file pone.0031559.s013.pdf]

| MC  | ST       | adk | SNP | atpA | SNP | dxr | SNP | glyA | SNP | recA | SNP | sodA | SNP | tpi | SNP | Associated RTs |
|-----|----------|-----|-----|------|-----|-----|-----|------|-----|------|-----|------|-----|-----|-----|----------------|
| A   | 18       | .   | .   | .    | .   | .   | 5   | 1    | .   | .    | .   | .    | .   | .   | .   | RT050          |
|     | 8        | .   | .   | .    | .   | .   | .   | .    | .   | .    | .   | 5    | 1   | .   | .   | RT002, RT159   |
|     | 16       | 1   | .   | 1    | .   | 2   | .   | 6    | .   | 1    | .   | 3    | .   | 1   | .   | RT050          |
|     | 31       | .   | .   | 5    | 1   | 7   | 1   | .    | .   | .    | .   | 1    | 1   | .   | .   | RT323          |
|     | 51       | .   | .   | .    | .   | .   | .   | .    | .   | .    | .   | 7    | 3   | 6   | 2   | RT186, RT249   |
|     | 52       | .   | .   | .    | .   | .   | .   | .    | .   | .    | .   | 12   | 2   | .   | .   | RT139          |
|     | 91       | .   | .   | .    | .   | 6   | 1   | .    | .   | .    | .   | 6    | 2   | .   | .   | RT326          |
|     | S10.1920 | .   | .   | .    | .   | .   | .   | .    | .   | .    | .   | 5    | 1   | 4   | 1   | RT002          |
|     | 55       | .   | .   | .    | .   | 6   | 1   | .    | .   | .    | .   | 12   | 2   | 12  | 1   | RT070          |
|     | 99       | .   | .   | 11   | 1   | 6   | 1   | .    | .   | .    | .   | 12   | 2   | 12  | 1   |                |
|     | 66       | .   | .   | .    | .   | .   | .   | .    | .   | .    | .   | 5    | 1   | 3   | 1   | RT022          |
|     | 98       | .   | .   | .    | .   | .   | .   | .    | .   | .    | .   | 1    | 1   | 3   | 1   |                |
| 115 | .        | .   | .   | .    | .   | .   | .   | .    | .   | .    | 7   | 3    | 3   | 1   |     |                |
| B   | 10       | 2   | .   | 1    | .   | 2   | .   | 1    | .   | 1    | .   | 3    | .   | 1   | .   | RT015, RT116   |
|     | 35       | .   | .   | 5    | 1   | 8   | 1   | .    | .   | .    | .   | .    | .   | 6   | 2   | RT046          |
|     | 44       | .   | .   | 5    | 1   | .   | .   | .    | .   | .    | .   | .    | .   | .   | .   | RT015, RT062   |
| C   | 12       | 1   | .   | 1    | .   | 6   | .   | 4    | .   | 3    | .   | 5    | .   | 1   | .   | RT003, RT094   |
|     | 57       | .   | .   | .    | .   | .   | .   | .    | .   | .    | .   | .    | .   | 13  | 1   | RT003          |
| D   | 13       | 1   | .   | 1    | .   | 6   | .   | 1    | .   | 5    | .   | 3    | .   | 1   | .   | RT014, RT129   |
|     | 50       | .   | .   | .    | .   | .   | .   | .    | .   | .    | .   | .    | .   | 17  | 1   | RT014          |
|     | Ai18     | 5   | 5   | .    | .   | .   | .   | .    | .   | .    | .   | .    | .   | .   | .   | RT014          |
| E   | 14       | 1   | .   | 1    | .   | 2   | .   | 1    | .   | 5    | .   | 5    | .   | 3   | .   | RT014          |
|     | 49       | .   | .   | .    | .   | .   | .   | .    | .   | .    | .   | 3    | 1   | .   | .   | RT014          |
| F   | 15       | 1   | .   | 1    | .   | 6   | .   | 1    | .   | 8    | .   | 5    | .   | 1   | .   | RT010, RT070   |
|     | 108      | .   | .   | .    | .   | .   | .   | .    | .   | .    | .   | .    | .   | 5   | 1   |                |
| G   | 19       | 1   | .   | 1    | .   | 8   | .   | 2    | .   | 1    | .   | 1    | .   | 3   | .   | RT110          |
|     | 20       | .   | .   | .    | .   | .   | 1   | 1    | .   | .    | .   | 4    | 2   | .   | .   | RT202          |
|     | 24       | .   | .   | .    | .   | .   | 12  | 1    | .   | .    | .   | 4    | 2   | .   | .   | RT202          |



|   |       |   |   |   |    |   |   |   |    |   |   |   |       |
|---|-------|---|---|---|----|---|---|---|----|---|---|---|-------|
|   | 79    | 1 | 3 | 2 | 1  | 1 | 1 | 1 | 16 |   |   |   |       |
| O | 104   | . | 1 | 1 | 13 | 1 | . | . | 6  | 1 |   |   |       |
|   | CD871 | . | . |   | 7  | 1 | . | 3 | 1  | . | 6 | 1 | RT259 |
